1 **A feature-based network analysis and fMRI meta-analysis of the task structure underlying**  
2 **prosocial decision-making reveal three distinct clusters: cooperation, equity, and altruism**

3 Shawn A. Rhoads<sup>1</sup>, Jo Cutler<sup>2</sup>, Abigail A. Marsh<sup>1</sup>

4 <sup>1</sup>Department of Psychology, Georgetown University, Washington DC, USA

5 <sup>2</sup>Centre for Human Brain Health, University of Birmingham, Birmingham, UK

6

7 **Keywords:** prosocial, decision-making, meta-analysis, cooperation, equity, altruism

8 **Correspondence to:**

9 Shawn A. Rhoads ([sr1209@georgetown.edu](mailto:sr1209@georgetown.edu))

10 37<sup>th</sup> and O Streets NW White Gravenor Hall 304, Washington DC, 200057

11 **Acknowledgements:** We would like to thank Peter E. Turkeltaub, Katherine O'Connell, Kathryn  
12 Berluti, Adam E. Green, and Joscelin Rocha-Hidalgo for helpful suggestions, discussions, and  
13 feedback regarding this project. We are also grateful to Daniel Campbell-Meiklejohn for support  
14 in collecting data, Lin Gan, Alexa King, and Kathleen Neill for their help identifying the task  
15 features, and all of the researchers who contributed their time and data for our meta-analysis.

16 **Funding:** This work was supported by the National Science Foundation Graduate Research  
17 Fellowship Program Award to S.A.R.

18 **Conflicts of interest:** Authors have nothing to disclose.

19

20  
21  
22  
23  
24  
25  
26  
27  
28  
29  
30  
31  
32  
33  
34  
35  
36  
37  
38  
39  
40  
41

## Abstract

Tasks that measure correlates of prosocial decision-making share one common feature: agents can make choices that increase the welfare of a beneficiary. However, prosocial decisions vary widely as a function of other task features. The diverse ways that prosociality is defined and the heterogeneity of prosocial decisions have created challenges for interpreting findings across studies and identifying their neural correlates. To overcome these challenges, the present study aimed to organize the prosocial decision-making task-space of neuroimaging studies. We conducted a systematic search for studies in which participants made decisions to increase the welfare of others during fMRI. We identified shared and distinct features of these tasks and employed an unsupervised graph-based approach to assess how various forms of prosocial decision-making are related in terms of their low-level components (e.g., task features like potential cost to the agent or potential for reciprocity). We uncovered three clusters of prosocial decisions: cooperation, equity, and altruism. This feature-based representation of the task structure was supported by results of a neuroimaging meta-analysis that each category of prosocial decisions recruited diverging neural systems. Results clarify some of the existing heterogeneity in how prosociality is conceptualized and generate insight for future research and task paradigm development.

42

## Introduction

43           Prosocial decisions—choices that increase the welfare of others—are universal across  
44 cultures (Henrich et al., 2005) and are integral for supporting interpersonal relationships at  
45 multiple scales, including between dyads (Declerck et al., 2013; Rusbult & Van Lange, 2003),  
46 among groups and social networks (de Waal, 2008; Fehr et al., 2002; Fehr & Camerer, 2007;  
47 Fehr & Fischbacher, 2003; FeldmanHall, 2017; Fowler & Christakis, 2010), and within societies  
48 (Nowak, 2006). And, while largely conserved across species (Burkart et al., 2014; de Waal, 2008;  
49 Hare, 2017), the prevalence and variety of prosociality exhibited by humans is unique (Fehr &  
50 Schurtenberger, 2018; Zaki & Mitchell, 2013). Although cognitive and neural processes  
51 underlying various forms of prosociality have been studied extensively across disciplines  
52 spanning psychology, neuroscience, economics, and biology, the heterogeneity of prosocial  
53 decisions has led to inconsistencies in how they are operationalized and categorized (Batson &  
54 Powell, 2003; de Waal, 2008; Declerck et al., 2013; Fehr et al., 2002; Fehr & Schmidt, 1999;  
55 Marsh, 2016; Parnamets et al., 2020; Rand & Nowak, 2013; Rilling et al., 2002; Ruff & Fehr,  
56 2014; Tricomi & Sullivan-Toole, 2015). This can create challenges when interpreting findings  
57 across neuroimaging studies or when attempting to understand how different types of prosocial  
58 decisions vary in terms of their underlying processes.

59           Derived from the Latin stem *pro* and root *socius*, signifying "for a companion", prosocial  
60 decision-making refers to "decisions made for the benefit of another" (*The American Heritage*  
61 *Dictionary of the English Language*, 2000). Laboratory tasks that measure correlates of prosocial  
62 decision-making share one common feature: allowing deciding participants (or agents) to make  
63 choices that increase the welfare of a beneficiary. However, prosocial decisions vary widely as a  
64 function of other task features. For example, although choosing to forgo resources (usually

65 money) to alleviate the suffering of a stranger (in a charitable donation task) versus choosing to  
66 contribute money to maximize equity among known members in a group (in a Public Goods  
67 Game) both share a common prosocial core of increasing the welfare of others, these decisions  
68 diverge along multiple other characteristics. In the first example, a prosocial agent sacrifices  
69 resources in response to another person's distress with the understanding that they will not  
70 receive anything in return—suggesting a likely role for empathic concern and planning for  
71 prosocial action without any anticipation of reward. In the second example, all prosocial agents  
72 are relying on the decisions of others and are hoping to increase the total pool of resources for  
73 everyone involved. This suggests a role for monitoring the expected actions of others' decisions  
74 and includes the anticipation of self-rewarding outcomes.

75         In addition to charitable donation tasks and Public Goods Games, other common  
76 prosocial paradigms include Dictator Games, Prisoner's Dilemmas, and Trust Games. Such tasks  
77 can be implemented with multiple variations, and the vast number of combinations of task  
78 features is a major source of heterogeneity. This heterogeneity raises the question of whether  
79 common mechanisms underlie all prosocial choices. One possibility is that prosocial decisions in  
80 each distinct task are supported by distinct mechanisms. But it is more likely that taxonomic  
81 clusters exist within the task-space of prosocial decision-making that reflect common underlying  
82 neural processes (Cutler & Campbell-Meiklejohn, 2019). One way to identify such clusters  
83 would be via a bottom-up approach aimed at characterizing the task structure of prosocial  
84 decision-making by analyzing the way specific tasks cluster according to their low-level features.  
85 In other words, developing one level of a formal representation (or ontology) of cognitive tasks  
86 and their inter-relationships (Poldrack & Yarkoni, 2016; Turner & Laird, 2012). The first goal of  
87 this paper was to clarify how different prosocial tasks are inter-related and how their low-level

88 features give rise to broad categories of prosocial decisions. Then, using this information across  
89 various studies, we employed an unsupervised graph-based approach to generate a preliminary  
90 characterization of the neuroimaging task-space comprised of the distinct and shared task  
91 features of prosocial decision-making paradigms. Finally, we conducted an fMRI meta-analysis  
92 to identify patterns of distinct and overlapping neural activation that correspond to the identified  
93 clusters of prosocial processes.

94         Breaking prosocial decision processes down into their relevant task features may allow a  
95 better understanding of how prosocial decisions are inter-related, and how they diverge. In  
96 general, the features that distinguish these tasks involve those related to the *beneficiary* (Is the  
97 beneficiary a real or imaginary person (or persons) or an organization like a charity? Is their  
98 identity apparent to the agent? Is their need or distress known to the agent?), to the *interaction*  
99 (Does the beneficiary also make decisions that will affect ultimate outcome? Will the agent and  
100 beneficiary interact only once or more than once?), and to the *outcomes* of the agent's decision  
101 (What is the magnitude of the benefit to the beneficiary? Will the decision result in rewarding  
102 outcomes for the agent? Will it be costly? Will the decision conform to social norms, such as  
103 equity? How certain is the outcome?). Multiple combinations of these features likely shape the  
104 context, motivations, and outcomes of prosocial decisions, and thus should recruit diverging  
105 neural systems.

106         **Features related to the beneficiary.** Various features related to the beneficiary of a  
107 prosocial decision are known to influence such decisions. Beneficiaries can include specific  
108 people, such as close or familiar others (Fareri et al., 2015; Hill et al., 2017; Schreuders et al.,  
109 2018; Sharp et al., 2011; Telzer et al., 2011) or in-group members (Balliet et al., 2014; Hackel et  
110 al., 2017; Telzer et al., 2015; Wills, Hackel, & Van Bavel, 2018), or can be hypothetical or even

111 non-human (e.g., computers) (Delgado et al., 2005; Fareri et al., 2012). Across contexts, agents  
112 are typically more willing to help people than computers (Fareri et al., 2015), and are more  
113 willing to help people close to them than strangers (Jones & Rachlin, 2006, 2009; Safin et al.,  
114 2013; Strombach et al., 2015). Neural activation during decisions that affect real versus  
115 imaginary beneficiaries (e.g., computer) is increased in regions important for theory of mind or  
116 inferring the mental states of others such as the temporoparietal junction (TPJ) (FeldmanHall et  
117 al., 2012).

118         In tasks that include real beneficiaries who are previously unknown to the agent, the  
119 beneficiary may be another participant in study (Weiland et al., 2012), or an anonymous stranger  
120 (Bault et al., 2014; Hutcherson et al., 2015; Strombach et al., 2015) who the agent may have  
121 briefly met before the task (Abe et al., 2019; Shaw et al., 2018) or seen in a photograph  
122 (Genevsky et al., 2013; Park et al., 2017). Receiving any identifying information about a  
123 beneficiary generally increases prosociality, in line with the identifiable victim effect (Jenni &  
124 Loewenstein, 1997; Kogut & Ritov, 2005; Lee & Feeley, 2016). This effect also results in greater  
125 prosociality toward single individuals versus collectives (Kogut & Ritov, 2005; Lee & Feeley,  
126 2016), including charitable organizations, whether predetermined (Greening et al., 2014), of the  
127 agent's choosing (Kuss et al., 2013), or from a list of charities (Hare et al., 2010; Izuma et al.,  
128 2010; Tusche et al., 2016). Increases in prosocial decision-making are particularly robust when  
129 the need or distress of the beneficiary is salient (FeldmanHall et al., 2015; Genevsky et al., 2013;  
130 Kuss et al., 2015; Tusche et al., 2016). Cues that signal need or distress typically elicit empathic  
131 concern, which motivates the desire to alleviate it (Batson, 2011; de Waal, 2008; Marsh, 2016;  
132 Preston & de Waal, 2002). This form of empathy is supported by activity in neural regions  
133 including the anterior insula, ACC, and pre-supplementary motor area (pre-SMA) (Lamm et al.,

134 2011) and empathic neural responding predicts prosocial decision-making both in and out of the  
135 laboratory (Tusche et al., 2016; Vekaria et al., 2020).

136       **Features related to the interaction.** Aspects of the interaction between agents and  
137 beneficiaries (or other agents) in prosocial tasks also influence agents' decisions, particularly  
138 when agents can learn about those with whom they are interacting. In some interactions, only  
139 one agent can influence the outcome. For example, in Dictator Games, agents unilaterally  
140 allocate resources between themselves and a beneficiary (Engel, 2011). In others, multiple agents  
141 can shape the outcome. For example, in social dilemmas or Trust Games, agents can choose to  
142 cooperate with others in order to increase the total pool of available resources for everyone  
143 involved, or can defect to obtain better outcomes for self (Balliet et al., 2011). Alternatively, in  
144 ultimatum games, agents receive feedback about their decisions from beneficiaries, who can  
145 accept or reject the offer (Güth et al., 1982).

146       Some prosocial decisions involve repeated interactions, which, unlike one-shot  
147 interactions, provide opportunities to reciprocate or respond to feedback about prior choices  
148 (Thielmann et al., 2020). When repeated interactions are expected, it typically motivates  
149 cooperation, with agents motivated to pay short-term cooperation "costs" to increase future  
150 reciprocity from a partner (Milinski et al., 2001; Rand & Nowak, 2013) and more willing to  
151 cooperate with partners who have cooperated previously (Fehr & Schurtenberger, 2018). This  
152 may be related to the ability to update expectations of others' likely behavior, a type of social  
153 learning is supported by the subgenual anterior cingulate cortex (ACC) (Christopoulos & King-  
154 Casas, 2014).

155       **Features related to outcomes.** Across interaction types, prosocial decisions are also  
156 shaped by their anticipated outcomes. In some cases, prosocial decisions may benefit the agent

157 directly. In Prisoner's Dilemmas or Public Goods Games, for example, decisions to cooperate  
158 increase the probability of future reciprocity. In such tasks, agents also take on the role of  
159 beneficiaries (Chaudhuri, 2011; Rand & Nowak, 2013), and thus must arbitrate between their  
160 own and others' rewards. These tasks often recruit neural systems that support subjective  
161 valuation and reward expectancy, such as the ventromedial PFC and ventral striatum (Parnamets  
162 et al., 2020; Wills, Hackel, & Van Bavel, 2018; Wills, Hackel, FeldmanHall, et al., 2018). These  
163 tasks also carry an element of uncertainty (Bellucci et al., 2017), with the agent's outcome often  
164 dependent on a beneficiary or trustee's choices (Mayer et al., 1995). Uncertainty during these  
165 decisions may be reflected through activation in the dorsal ACC (Aimone et al., 2014).

166       Prosocial choices may also yield more abstract rewards, such as conformity to desirable  
167 social norms like maximizing equity among multiple parties (via, for example, a 50-50 split of  
168 resources) (Fehr & Schurtenberger, 2018; Krupka & Weber, 2013; López-Pérez, 2008). In some  
169 cases, agents may choose to act prosocially and forgo resources to avoid deviating from desirable  
170 norm, which is known as disadvantageous inequity aversion (Tricomi & Sullivan-Toole, 2015).  
171 Equitable interpersonal decisions are thought to engage neural structures involved in computing  
172 subjective value such as the medial PFC and ventral striatum, and thus may be motivated through  
173 increased intrinsic value placed on the decision (Zaki & Mitchell, 2011), perhaps via their goal of  
174 producing increased subjective happiness for agents and beneficiaries (Tabibnia et al., 2007;  
175 Tabibnia & Lieberman, 2007). In tasks with repeated interactions, these decisions may also  
176 reflect the maintenance of abstract, norm-based rules regarding fairness or reciprocity in  
177 dorsolateral PFC (Guroglu et al., 2014; van den Bos et al., 2009).

178       In other prosocial decision-making tasks (such as Dictator Games or charitable giving  
179 tasks) agents can forgo resources (including money, time, effort, or safety) solely to benefit



180 others. In this case, prosocial choices are made despite certain concrete costs to the agent, often  
181 to alleviate the beneficiary's distress or need. As described above, such decisions are thought to  
182 be driven by activation in regions like anterior insula, which represent negative affective states  
183 (e.g., pain or distress) of the beneficiary (FeldmanHall et al., 2015; Tusche et al., 2016). Such  
184 choices also may yield indirect gains, including increases in mood or well-being (Aknin et al.,  
185 2012; Curry et al., 2018; Dunn et al., 2008), possibly related to the vicarious reward of  
186 improving the beneficiary's welfare (Mobbs et al., 2009); such vicarious reward may be  
187 supported by activity in ventral striatum and ventromedial PFC.

188         Given the diversity of extant prosocial decision tasks, two recent meta-analytic studies  
189 have been very valuable in describing the neural correlates of prosocial behaviors aggregated  
190 across tasks that reflect divergent constellations of the above variables. Bellucci and colleagues  
191 (2020) aggregated across a wide range of tasks in which participants made decisions about  
192 others, rated others' traits, or judged others' behaviors in an effort to find neural activation  
193 overlap among prosociality, empathy, and mentalizing. They found four regions to be  
194 preferentially engaged across the tasks they incorporated: dorsolateral PFC, ventromedial PFC,  
195 dorsal posterior cingulate cortex (PCC), and middle cingulate cortex (MCC). Of these regions,  
196 they found a conjunction in dorsal PCC activation during tasks involving prosocial behavior and  
197 tasks involving mentalizing (understanding another person's needs and inferring goals across  
198 contexts); they also found a conjunction in MCC activation across tasks involving prosocial  
199 behavior and tasks involving empathy (resonating with another's needs) (Bellucci et al., 2020).  
200 Activation during prosocial behavior in the dorsolateral PFC and ventromedial PFC did not  
201 overlap with activation during mentalizing or empathy tasks. This work identified common  
202 neural patterns underlying a range of behaviors related to prosociality, but by not considering key

203 differences among types of prosocial decisions, it was not able to identify whether they are  
204 supported by distinct processes. Cutler and Campbell-Meiklejohn (2019) provided preliminary  
205 evidence that distinct neural regions do indeed support different forms of prosocial decision-  
206 making, finding diverging patterns of activation for prosocial behaviors that do not provide an  
207 opportunity to gain extrinsic rewards (and thus likely are intrinsically motivated) versus those  
208 with the probability of gaining an extrinsic reward. For example, extrinsically motivated  
209 decisions recruited greater activity in striatal regions relative to intrinsically motivated decisions.  
210 In contrast, intrinsically motivated decisions recruited increased activation in ventromedial PFC  
211 relative to extrinsically motivated decisions. Activation in ventromedial PFC also differentiated  
212 these types along a posterior (intrinsic) to anterior (extrinsic) axis.

213         However, the distinction between extrinsic and intrinsic motivation was determined in  
214 advance, rather than being driven by objective features of the data. This is also only one of many  
215 possible distinctions among forms of prosocial behavior. An alternative means of investigating  
216 neural substrates of various prosocial decision tasks could instead take a more bottom-up  
217 approach that identifies distinct clusters of tasks that emerge from statistical variation in their  
218 objective features or outcomes. For example, a recent behavioral study analyzed the behavioral  
219 outcomes of different economic prosocial tasks (such as the percentage of prosocial decisions  
220 during each task, the ratio of other-regarding to self-regarding decisions in each, average  
221 monetary donations, or summary scores of self-reported measures). Using factor analysis, they  
222 determined that the prosocial tasks clustered into four factors that the authors termed:  
223 altruistically motivated prosocial behavior, norm-motivated prosocial behavior, strategically  
224 motivated prosocial behavior, and self-reported prosocial behavior (Böckler et al., 2016).

225 We sought to use a similar bottom-up approach to meta-analytically investigate the neural  
226 correlates of prosocial decision-making during fMRI. We focused on objective features that  
227 distinguish the tasks themselves, which included features related to outcomes of decisions, to the  
228 beneficiaries of the decision, and to the interaction between agents and beneficiaries. We first  
229 compiled data from 43 unique fMRI studies of prosocial decision-making (including 25 maps  
230 and 18 coordinate tables across 1,423 participants). We then dummy-coded task features related  
231 to the beneficiary, interaction, and outcome of each decision and employed a data-driven, graph-  
232 based approach to identify clusters of studies based on their overlapping versus distinct task  
233 features. (As described in detail below, this approach indicated that the prosocial decision-  
234 making task-space comprises three clusters: cooperation, equity, and altruism). We next used a  
235 meta-analytic approach that combined group-level statistical parametric images with reported  
236 peak-coordinates to identify divergent neural activation patterns across these clusters of studies.  
237 In so doing, the present study resolves some discrepancies in how prosocial decisions are  
238 conceptualized, expands understanding regarding how prosocial decisions are related and  
239 distinct, and generates insight for future research.

## 240 **Method**

### 241 **Literature search and study selection**

242 A literature search using PubMed identified research published prior to June 2019 using  
243 keywords either ("fMRI" or "neur\*") and one of the following: ("prosocial", "trust game",  
244 "fairness", "reciproc\*", "cooperat\*", "charitable", "public goods", "dictator", "ultimatum",  
245 "prisoner\*"). The search returned 201 articles. We removed 124 articles that did not meet key  
246 criteria, such as non-neuroimaging studies, neuroimaging studies that did not use functional  
247 magnetic resonance imaging (fMRI), and literature reviews or meta-analyses. Independently, we

248 identified 123 potential articles from the reference lists of the remaining 77 articles. After  
249 removing all duplicate titles from the combined lists, 146 articles remained. We then selected  
250 only articles that reported novel whole-brain fMRI data (i.e., data only published once) that were  
251 collected while participants made decisions that benefitted another individual (prosocial  
252 decisions). We also limited our search to include only data from studies that were able to  
253 examine differences in activation during prosocial decisions relative to decisions that benefitted  
254 the agent alone (selfish decisions). In some cases, this was a contrast between prosocial choices  
255 and selfish choices within a task condition or parametric modulation of the amount given. For  
256 other studies, the contrast was between decisions during a prosocial condition and a self-only  
257 condition. We did not include contrasts involving alternate control conditions (e.g., rest,  
258 visuomotor controls), even when these were available, due to significant variation in brain  
259 activation (Cutler & Campbell-Meiklejohn, 2019). Upon review of the remaining 146 articles, 69  
260 were identified that met our inclusion criteria.

261 We sent emails to the corresponding authors of all included studies to request  
262 unthresholded, group-level t-statistic map(s) from the study that best fit our criteria. For studies  
263 that included pharmacological manipulations or clinical populations, we requested data from  
264 only the control group. If maps were not available, we requested coordinates for contrasts of  
265 interests or extracted them from manuscripts. If a coordinate table reported Z-scores or Talaraich  
266 coordinates, peak values were transformed to *t*-statistics and MNI coordinates, respectively. If  
267 the contrast of interest was reported in both directions (e.g. cooperate > defect and defect >  
268 cooperate), the selfish contrast peaks were assigned as negative *t*-values. Ultimately, we obtained  
269 the necessary data from 43 unique fMRI studies, including 25 maps and 18 coordinate tables that  
270 included data from 1,423 subjects (Table 1).

**Table 1.** Descriptions of studies included in meta-analysis

| Study                      | N  | Proportion female | Map or peak | Task                                                         | T    | FWHM             | Program       | Sig                | Contrast selected                       | Cluster Label |
|----------------------------|----|-------------------|-------------|--------------------------------------------------------------|------|------------------|---------------|--------------------|-----------------------------------------|---------------|
| (Abe et al., 2019)         | 19 | 9 / 19            | map         | Joint force-production task                                  | 3T   | 8mm <sup>3</sup> | SPM12         | Pcorr < 0.001      | Joint performance vs single performance | C             |
| (Aimone et al., 2014)      | 28 | 15 / 30 total     | peak        | Trust Game, one-shot, binary (investor)                      | 3T   | 8mm <sup>3</sup> | SPM8          | Puncorr <.0001     | Share vs keep                           | C             |
| (Bault et al., 2014)       | 25 | 12 / 29 total     | map         | Public Goods Game                                            | 3T   | 5mm <sup>3</sup> | FSL           | Pcorr < 0.05 (FWE) | PM monetary choice                      | C             |
| (Chen et al., 2016)        | 93 | 50 / 104 total    | map         | Prisoner's Dilemma, iterative                                | 3T   | 5mm <sup>3</sup> | FSL           | Pcorr <0.05 (FWE)  | Cooperation vs defect (placebo only)    | C             |
| (Decety et al., 2004)      | 12 | 6 / 12            | peak        | Cooperative Pattern Game                                     | 3T   | 4.5 x 4.5 x 6 mm | SPM2          | Pcorr < 0.05       | Cooperation vs competition              | C             |
| (Delgado et al., 2005)     | 12 | 6 / 14 total      | peak        | Trust Game, binary, iterative (investor)                     | 3T   | 4mm <sup>3</sup> | Brain Voyager | Puncorr < 0.001    | Share vs keep                           | C             |
| (Fareri et al., 2015)      | 26 | 14 / 26           | map         | Trust Game, binary, iterative (investor)                     | 3T   | 4mm <sup>3</sup> | Brain Voyager | N/A                | Share vs keep (across all partners)     | C             |
| (FeldmanHall et al., 2012) | 14 | 8 / 14            | peak        | Your Pain, My Gain Task                                      | 3T   | 8mm <sup>3</sup> | SPM           | Pcorr < 0.05       | PM monetary choices, no covariates      | A             |
| (FeldmanHall et al., 2015) | 17 | 11 / 17           | peak        | Your Pain, My Gain Task                                      | 3T   | 8mm <sup>3</sup> | SPM5          | Pcorr < 0.05 (FWE) | PM monetary choice                      | A             |
| (Fermin et al., 2016)      | 33 | 18 / 33           | map         | Prisoner's Dilemma, one-shot                                 | 3T   | 8mm <sup>3</sup> | SPM8          | Puncorr <.005      | Cooperation vs defect                   | C             |
| (Fouragnan et al., 2013)   | 18 | 0 / 18            | peak        | Trust Game (with priors manipulation)                        | 4T   | 8mm <sup>3</sup> | SPM8          | Pcorr < 0.005      | Share vs keep                           | C             |
| (Garbarini et al., 2014)   | 16 | 8 / 16            | map         | Trust Game, one-shot (responder)                             | 1.5T | 4mm <sup>3</sup> | Brain Voyager | Pcorr < 0.05       | Reciprocate vs defect                   | E             |
| (Genevsky et al., 2013)    | 11 | 6 / 11            | peak        | Charitable donation task with identifiable victim            | 3T   | 4mm <sup>3</sup> | AFNI          | Puncorr < 0.005    | Donation vs no donation                 | A             |
| (Greening et al., 2014)    | 18 | 9 / 18            | peak        | Charity task                                                 | 3T   | 4mm <sup>3</sup> | AFNI          | Pcorr < 0.05       | Charity vs self                         | A             |
| (Guroglu et al., 2014)     | 22 | 17 / 28 total     | peak        | Modified Dictator Game (self-maximizing inequity (SMI) game) | 3T   | 8mm <sup>3</sup> | SPM8          | Puncorr < 0.005    | Equal split vs unequal                  | E             |
| (Hare et al., 2010)        | 22 | 22 / 22           | map         | Charitable donation task                                     | 3T   | 8mm <sup>3</sup> | SPM5          | Puncorr < 0.0005   | PM monetary choice                      | A             |

|                                   |     |                 |      |                                                                  |    |                  |                           |                     |                                                         |   |
|-----------------------------------|-----|-----------------|------|------------------------------------------------------------------|----|------------------|---------------------------|---------------------|---------------------------------------------------------|---|
| (Hutcherson et al., 2015)         | 51  | 0 / 51          | map  | Modified Dictator Game, with probable outcomes                   | 3T | 8mm <sup>3</sup> | SPM8                      | Puncorr < 0.05      | Prosocial choice vs self                                | A |
| (Izuma et al., 2010)              | 23  | 12 / 23         | map  | Charitable donation task in presence or absence of observer      | 3T | 6mm <sup>3</sup> | SPM5                      | Puncorr < 0.001     | Donation vs no donation (no observers)                  | A |
| (Koban et al., 2014)              | 17  | 10 / 22 total   | map  | Modified Dictator Game, Sharing/keeping during conflict          | 3T | 8mm <sup>3</sup> | SPM8                      | Puncorr < 0.001     | Equal split vs self during human interpersonal conflict | E |
| (Kuss et al., 2013)               | 33  | 14 / 33         | map  | Charitable donation task, with probable outcomes                 | 3T | 6mm <sup>3</sup> | SPM8                      | Puncorr < 0.001     | Costly donation vs self                                 | A |
| (Lee et al., 2018)                | 16  | 0 / 16          | map  | Tetris-like game, with self, helping, and harming conditions     | 3T | 8mm <sup>3</sup> | SPM5                      | Pcorr < 0.05        | Help vs self                                            | A |
| (Lelieveld et al., 2013)          | 26  | 17 / 26         | map  | Dictator Game with emotional manipulation                        | 3T | 6mm <sup>3</sup> | SPM5                      | Puncorr < 0.001     | Equal split vs unequal split                            | E |
| (Morishima et al., 2012)          | 27  | 17 / 30 total   | map  | Dictator Game                                                    | 3T | 8mm <sup>3</sup> | SPM8                      | Pcorr < 0.05 (FWE)  | Donation vs self                                        | A |
| (Park et al., 2017)               | 159 | 100 / 166 total | map  | Dictator Game with Faces                                         | 3T | 4mm <sup>3</sup> | AFNI                      | Puncorr < 0.005     | Giving vs not giving (offer only)                       | A |
| (Ramsøy et al., 2015)             | 30  | 14 / 30         | peak | Prisoner's Dilemma, with belief prompts about partner's decision | 3T | 8mm <sup>3</sup> | SPM8                      | Puncorr < 0.001     | Cooperation vs defect                                   | C |
| (Schneider-Hassloff et al., 2015) | 164 | 78 / 164        | map  | Prisoner's Dilemma with measures of attachment style             | 3T | 8mm <sup>3</sup> | SPM8                      | Puncorr < 0.001     | Cooperation vs defect                                   | C |
| (Schreuders et al., 2018)         | 22  | 12 / 27 total   | map  | Modified Dictator Game (self-maximizing inequity game)           | 3T | 8mm <sup>3</sup> | SPM8                      | Pcorr < 0.05        | Equal split vs self (across interaction partners)       | E |
| (Schreuders et al., 2019)         | 39  | 29 / 50 total   | map  | Modified Dictator Game (self-maximizing inequity game)           | 3T | 8mm <sup>3</sup> | SPM8                      | Pcorr < 0.001       | Equal split vs self (across interaction partners)       | E |
| (Sharp et al., 2011)              | 20  | 0 / 20          | map  | Trust Game (investor)                                            | 3T | 4mm <sup>3</sup> | AFNI                      | Puncorr < 0.001     | Share vs keep (controls)                                | C |
| (Shaw et al., 2018)               | 38  | 0 / 38          | peak | Ultimatum Game (proposer)                                        | 3T | 5mm <sup>3</sup> | FSL (preproc) SPM12 (GLM) | Pcorr < 0.001 (FWE) | PM monetary choice (proposers only)                     | C |

|                                    |    |               |      |                                                             |      |                  |               |                    |                                                                      |   |
|------------------------------------|----|---------------|------|-------------------------------------------------------------|------|------------------|---------------|--------------------|----------------------------------------------------------------------|---|
| (Smith-Collins et al., 2013)       | 24 | 24 / 24       | peak | Trust Game, iterative (investor)                            | 1.5T | 8mm <sup>3</sup> | SPM8          | Puncorr < .001     | Cooperation vs defect                                                | C |
| (Stanley et al., 2012)             | 40 | 22 / 40       | map  | Trust Game, one-shot (investor)                             | 3T   | 6mm <sup>3</sup> | SPM8          | Pcorr < .05 (FWE)  | PM monetary choices (only human partners)                            | C |
| (Strombach et al., 2015)           | 27 | 13 / 27       | map  | Modified Dictator Game with social distance manipulation    | 3T   | 8mm <sup>3</sup> | SPM8          | Pcorr < 0.005      | Equal split vs self                                                  | E |
| (Telzer et al., 2011)              | 25 | 13 / 25       | map  | Family Assistance Task                                      | 3T   | 8mm <sup>3</sup> | SPM5          | Pcorr < 0.05       | Costly donation vs self                                              | A |
| (Telzer et al., 2015)              | 29 | 13 / 29       | map  | Modified Dictator Game with group membership manipulation   | 3T   | 8mm <sup>3</sup> | SPM8          | Pcorr < 0.05       | Donation vs self                                                     | A |
| (Tusche et al., 2016)              | 23 | 15 / 33 total | map  | Charitable donation task                                    | 3T   | 8mm <sup>3</sup> | SPM8          | Pcorr < .05 (FWE)  | High donation vs low donation                                        | A |
| (van den Bos et al., 2009)         | 18 | 9 / 18        | peak | Trust Game, one-shot (responder)                            | 3T   | 6mm <sup>3</sup> | SPM2          | Puncorr < 0.001    | Reciprocate vs defect                                                | C |
| (Watanabe et al., 2014)            | 48 | N/A           | peak | Pay-it-forward + reputation-based indirect reciprocity game | 3T   | 8mm <sup>3</sup> | SPM8          | Pcorr < 0.05 (FWE) | Cooperation vs defect (pay-it-forward & reputation-based conditions) | C |
| (Weiland et al., 2012)             | 14 | 8 / 14        | peak | Dictator Game                                               | 3T   | 8mm <sup>3</sup> | Brain Voyager | Puncorr < 0.005    | Fair split (6:6, 7:5) vs unfair (8:4, 9:3, 10:2, 11:1)               | E |
| (Will et al., 2016)                | 43 | 17 / 43       | map  | Dictator Game after Cyberball                               | 3T   | 8mm <sup>3</sup> | SPM8          | Puncorr < .001     | Equitable choice vs inequitable                                      | E |
| (Wills, Hackel, & Van Bavel, 2018) | 42 | 32 / 47       | peak | Public Goods Game                                           | 3T   | 6mm <sup>3</sup> | SPM12         | Pcorr < .05        | Give vs keep                                                         | C |
| (Wittmann et al., 2016)            | 24 | 9 / 24        | peak | Cooperation Task                                            | 3T   | 5mm <sup>3</sup> | FSL           | Pcorr < 0.05 (FWE) | Cooperation versus competition                                       | C |
| (Zaki & Mitchell, 2011)            | 15 | 6 / 15        | peak | Modified Dictator Game                                      | 3T   | 6mm <sup>3</sup> | SPM           | Pcorr < 0.005      | Equitable choice vs inequitable                                      | E |

**Note.** Some studies only reported gender as a proportion of the total sample, but not the final analytic sample. C=Cooperative; E=Equitable; A=Altruistic

## 271 **Identifying task features across studies**

272 We first reviewed the details of the methodologies of all available tasks and identified 13  
273 distinct task features that varied among existing prosocial decision-making tasks across  
274 neuroimaging studies (Figure 1). These task features can be broken down into those vary as a  
275 function of the beneficiary, the interaction, and the outcome. (Although in theory features related  
276 to the agent can also vary, all participants included in the present study were healthy control  
277 adults, and we did not identify consistent features related to these participants—for example,  
278 consistent individual difference measures—in the available literature). Four independent raters  
279 dummy coded ("present" or "absent") the 13 features during the prosocial decision phase for the  
280 available contrast in each study with high initial agreement among coders ( $ICC=.82$ ,  $CI_{95\%}=[.79,$   
281  $.84]$ ). Discrepancies in the initial coding were then resolved through a consensus agreement  
282 across each of the four coders.

## 283 **Identifying clusters within the task structure of prosocial decision-making**

284 We next applied an unsupervised, graph-based approach to assess differential clusters of  
285 prosocial decisions based on their task features. We used the identified features to construct a  
286 bipartite graph. This graph contained two sets of nodes: nodes representing the 13 different task  
287 features and nodes representing the 43 different prosocial decision study contrasts. In this graph,  
288 an edge exists between a feature node and a study node if the study contrast contained the task  
289 feature (Figure 1, top). The bipartite graph was then projected onto a weighted network of  
290 studies, where edge weights between studies represented the Dice similarity coefficient (Dice,  
291 1945) or the degree of overlapping task features relative to the total possible task features. We  
292 then ran the Louvain community detection algorithm (Blondel et al., 2008), which assigned study  
293 nodes to clusters in two steps. First, the algorithm finds small clusters of studies by optimizing



294 local modularity. Second, it aggregates studies of the same cluster in a hierarchical fashion and  
295 builds a new network whose nodes are these clusters. These steps were repeated iteratively until  
296 the global modularity was maximized.

### 297 **Neuroimaging preprocessing and meta-analyses**

298 We next conducted meta-analyses combining reported peak information (coordinates and  
299 *t*-statistics) with original statistical parametric maps using the Anisotropic Effect Size Signed  
300 Differential Mapping software (AES-SDM, version 5.141; Radua et al., 2014). We selected this  
301 analytical technique rather than alternatives, such as coordinate-based activation likelihood  
302 (Eickhoff et al., 2009; Turkeltaub et al., 2002), because this approach enabled the utilization of  
303 precise, continuous estimates of effect sizes, assessment of between-study heterogeneity, and  
304 identification of potential publication bias (Radua et al., 2012). Using AES-SDM, within-study,  
305 voxel-level maps of effect sizes (*Hedge's g*) and their variances were re-created for each study.  
306 When only reported coordinates and statistics were available for a study, we calculated the effect  
307 size at each peak and estimated effect sizes in neighboring voxels based on the Euclidean  
308 distance between voxels and the peak using a 20mm FWHM Gaussian function (Radua et al.,  
309 2012, 2014). This method of estimation is similar to the estimation of activation likelihood used  
310 in peak-probability meta-analytic methods, but the use of effect sizes in the calculation increases  
311 the accuracy of estimation of the true signal (Radua et al., 2012). When the *t*-statistics of the  
312 peak coordinates were unknown (one study: Delgado et al., 2005), we imputed the effect size  
313 with the extent threshold reported in the study.

314 We conducted three random-effects models to compute a meta-analytic activation for  
315 each prosocial category identified using the Louvain community detection algorithm. Each  
316 individual study was weighted by the inverse sum of its variance plus the between-study variance

317 as obtained by the DerSimonian-Laird estimator of heterogeneity (DerSimonian & Laird, 1986).  
318 Within this random-effects framework, studies with larger sample sizes or lower variability  
319 contribute more and effects are assumed to randomly vary between study samples. To assess  
320 statistical significance, we implemented a modified permutation test that empirically estimated a  
321 null distribution for each meta-analytic brain map. We thus tested the hypothesis that each map's  
322 true effect sizes were not the result of a random spatial association among studies within a  
323 prosocial category. We applied a threshold of  $p < .005$  as recommended by Radua et al. (2012) to  
324 optimally balance specificity and sensitivity while yielding results approximately equivalent to  
325  $p < .05$  corrected for multiple comparisons. Reported z-scores are specified as SDM-Z, as they do  
326 not follow a standard normal distribution. We also conducted three pairwise comparisons of  
327 activation maps across each of the three prosocial categories, which followed the same  
328 procedures (see Supplemental Table S1).

329 The effect size maps were imported into AFNI (Cox, 1996) and a conjunction analysis  
330 was conducted to examine the overlap of consistently activated regions across altruism,  
331 cooperation, and equity. Conjunction was determined using 3dcalc by overlaying the thresholded  
332 meta-analytic maps for each category to determine activation overlay.

## 333 Results

### 334 Clustering tasks into categories of prosocial decision-making

335 The Louvain clustering algorithm revealed three clusters of prosocial decision-making  
336 tasks (Figure 1). Upon inspection, we labeled these *cooperative* decisions (blue), *equitable*  
337 decisions (yellow), and *altruistic* decisions (red) based on the task features shared within each  
338 cluster. Cooperative decisions (N=19; 8 maps, 11 coordinate tables) are those in which as  
339 decisions involve multiple agents acting prosocially to maximize resources (tasks included

340 Prisoner's Dilemmas, Public Goods Games, Ultimatum Games played by proposers, Trust  
341 Games, and non-economic cooperative tasks). Equitable decisions (N=10; 7 maps, 3 coordinate  
342 tables) are those in which decisions produce equitable outcomes for the agent and beneficiary  
343 (tasks included Dictator Games in which 50-50 splits were possible). Finally, altruistic decisions  
344 (N=14; 10 maps, 4 coordinate tables) are those in which agents make decisions to forgo  
345 resources without receiving anything in return (tasks included charitable donation tasks, Dictator  
346 Games in which 50-50 splits were not possible, Your Pain, My Gain tasks, and assistance tasks).

347

348

349

350

351

352

353

354

355

356

357

358

359

360

361

362

**Figure 1.** Graph depiction of study network generated from overlapping task features

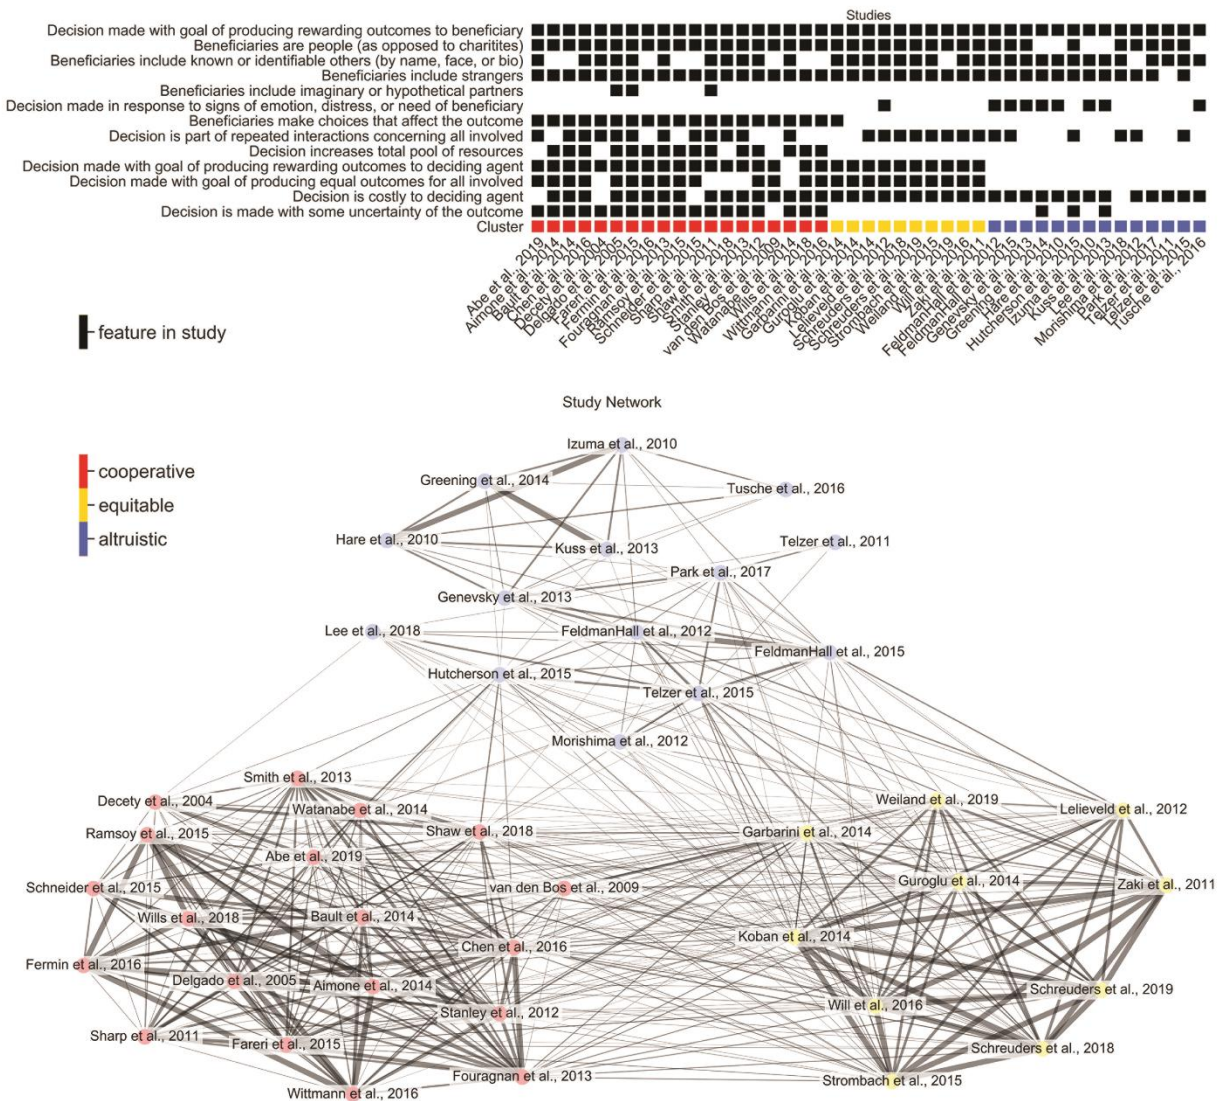

**Note.** (top) Studies were labeled with task features to construct a bipartite graph where edges (black boxes in incidence matrix) exist between a feature node and study node if the study contrast contained the task feature. (bottom) The bipartite graph was projected onto a weighted study network, where wider edge weights between studies represented a larger Dice similarity coefficient (or greater similarity according to task features). A community detection algorithm based on modularity maximization revealed three clusters of studies, which were then labeled as cooperative (blue), equitable (yellow), and altruistic (red) decisions based on the task features shared within each cluster. For visualization purposes, the depicted graph was thresholded to only display edges with a Dice similarity coefficient greater than .70 (note that the actual graph was fully-connected).

363 **Meta-analyses**

364 **Neural correlates of cooperative decisions.** In the cooperative decision cluster,  
365 prosocial decisions (in contrast to selfish decisions) were associated with increased activation in  
366 right inferior frontal gyrus, bilateral subgenual ACC, left ventral striatum (including caudate  
367 nucleus), bilateral insula, bilateral MCC, left supramarginal gyrus extending to superior temporal  
368 gyrus, left lateral postcentral gyrus, bilateral ventral tegmental area (VTA), left thalamus, left  
369 precuneus, right cerebellum lobule VIII, and bilateral occipital cortex. We did not find  
370 significantly increased activation in any region during selfish versus cooperative decision-  
371 making (Figure 2, Table 2).

372 **Neural correlates of equitable decisions.** In the equitable decision cluster, prosocial  
373 decisions (in contrast to selfish decisions) were associated with increased activation in bilateral  
374 orbital frontal cortex (OFC), bilateral ventrolateral PFC, bilateral dorsolateral PFC, bilateral  
375 medial PFC including rostral ACC, bilateral ventral striatum and caudate, and left occipital  
376 cortex. Activation was increased during selfish relative to equitable decisions in left dorsolateral  
377 PFC, medial portion of left precentral gyrus, lateral portion of bilateral precentral gyrus, left  
378 thalamus, bilateral supramarginal gyrus, left inferior temporal gyrus, bilateral posterior superior  
379 temporal sulcus (STS), and bilateral occipital cortex (Figure 2, Table 2).

380 **Neural correlates of altruistic decisions.** In the altruistic decision cluster, prosocial  
381 decisions (in contrast to selfish decisions) were associated with increased activation in several  
382 regions including left ventromedial PFC, bilateral ACC and paracingulate gyrus, bilateral pre-  
383 SMA, bilateral anterior insula, right ventrolateral PFC, left bilateral dorsolateral PFC, thalamus,  
384 right ventral striatum, right precuneus, and bilateral interior parietal gyrus.

385 We also found increased activation during selfish decision-making, in contrast to  
386 altruistic decision-making, in several regions including right dorsolateral PFC, right ventrolateral  
387 PFC right putamen, bilateral posterior insula, bilateral precentral gyrus, right middle temporal  
388 gyrus (MTG), superior temporal gyrus (STG), right STS left parahippocampal gyrus, right  
389 superior parietal gyrus, bilateral middle occipital gyrus, and left cerebellum crus I and II (Figure  
390 2, Table 2).

### 391 **Pairwise meta-analytic map comparisons**

392 Pairwise comparisons confirmed that the meta-analytic maps derived from each cluster of  
393 studies were distinct from one another. When comparing activation for cooperative relative to  
394 equitable decisions, we found increased activation in regions that included left ventrolateral PFC,  
395 left SMA, right caudate, left hippocampus, bilateral thalamus, left VTA, left supramarginal  
396 gyrus, and left superior parietal gyrus (Supplemental Figure 1a). We did not find increased  
397 activity in any region for equitable relative to cooperative decisions. When comparing activation  
398 for equitable relative to altruistic decisions, however, we found increased activation for equitable  
399 relative to altruistic decisions in regions that included right ventrolateral PFC, bilateral posterior  
400 insula, and right STG (Supplemental Figure 1b).

401 When comparing activation for altruistic relative to equitable decisions, we found  
402 increased activation in regions that included dorsolateral PFC, bilateral pre-SMA, left anterior  
403 insula, bilateral caudate, left thalamus, and left hippocampus (Supplemental Figure 1c). Finally,  
404 when comparing activation for altruistic relative to cooperative decisions, we found increased  
405 activation in regions that included left dorsolateral PFC, left SMA, left MTG, and left angular  
406 gyrus (Supplemental Figure 1d). We did not find increased activity in any region for cooperative  
407 relative to altruistic decisions. See Supplemental Table S1 for results.

408 **Conjunction across meta-analytic maps**

409 Conjunction analyses identified overlapping regions of activation for altruism  $\cap$  equity  
410 and cooperation  $\cap$  equity. Overlapping activation for altruism  $\cap$  equity was observed in bilateral  
411 dorsolateral PFC (BA9/46; left: [-44, 34, 20], k=19; right: [46, 40, 24], k=24), left ventrolateral  
412 PFC (BA10; [-42, 44, -4], k=32), and left visual cortex (BA18, [-20, -96, -8], k=34). Overlapping  
413 activity for equity  $\cap$  cooperation was observed in bilateral ventral striatum (left: [-2, 4, -8]; right:  
414 [4, 4, -8]; k=4). We did not find overlapping activation for cooperation  $\cap$  altruism nor across all  
415 three clusters of studies.

416 **Data availability**

417 All thresholded and unthresholded meta-analytic activation maps will be openly available  
418 on the Open Science Framework at <https://osf.io/3vu9w/>.

419

420

421

422

423

424

425

426

427

428

429

430



**Figure 2.** Thresholded results from meta-analyses.

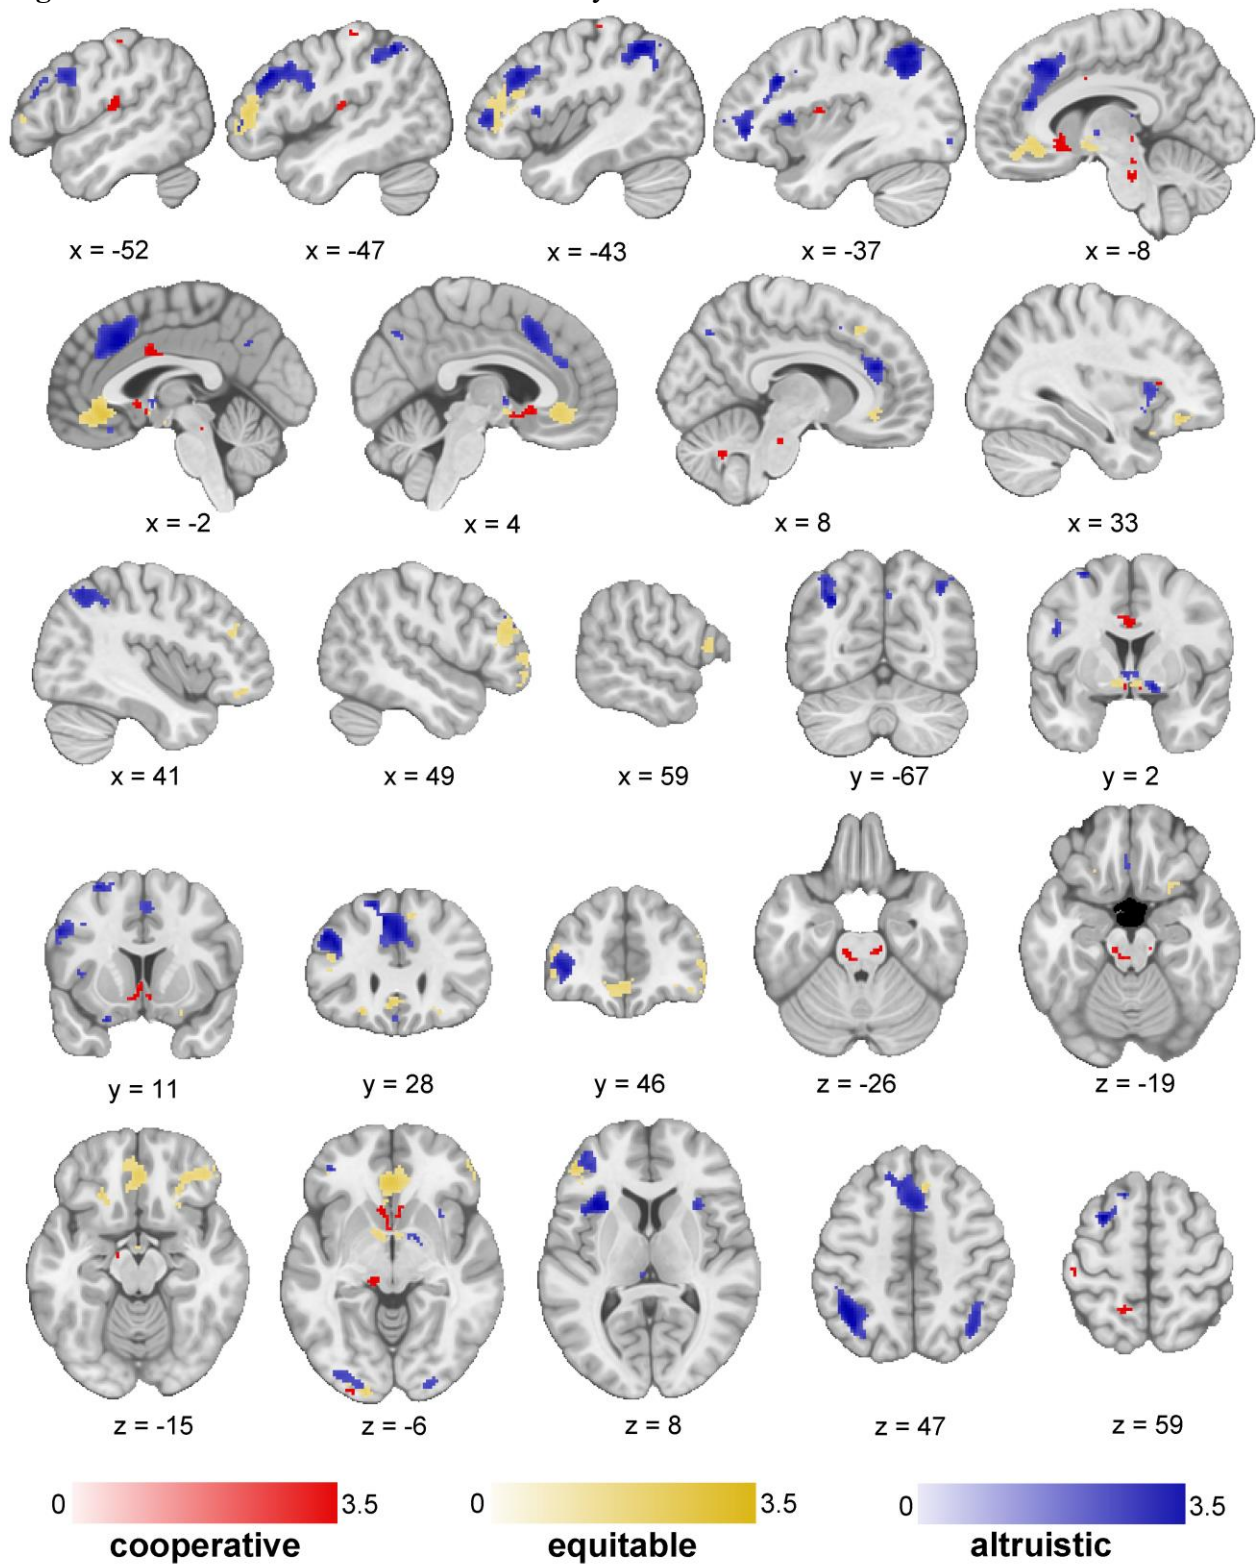

**Note.** Results from each of three mixed-effects models displaying the main effects of decision-making category (cooperative: red; equitable: yellow; altruistic: blue). SDM-Z maps are corrected using a threshold of  $p < .005$  and  $k > 10$ .



**Table 2.** Results from the meta-analyses.

| <b>Cooperative &gt; selfish decisions (increased activity)</b>        |                      |              |          |               |              |              |              |
|-----------------------------------------------------------------------|----------------------|--------------|----------|---------------|--------------|--------------|--------------|
| <b>Region</b>                                                         | <b>Brodmann Area</b> | <b>SDM-Z</b> | <b>P</b> | <b>Voxels</b> | <b>MNI-x</b> | <b>MNI-y</b> | <b>MNI-z</b> |
| Inferior frontal gyrus, triangular part extending to insula (R)       | 48                   | 3.824        | 0.000581 | 11            | 34           | 24           | 10           |
| Ventral striatum extending to caudate and subgenual cingulate (L)     |                      | 4.682        | 0.000021 | 89            | -6           | 16           | -2           |
| Subgenual anterior cingulate cortex extending to olfactory cortex (R) | 25                   | 3.65         | 0.001053 | 28            | 4            | 12           | -10          |
| Middle cingulate cortex extending to paracingulate gyri (L, R)        | 24                   | 3.853        | 0.000523 | 45            | -2           | 4            | 32           |
| Insula (L)                                                            | 48                   | 3.497        | 0.001740 | 14            | -38          | -4           | 12           |
| Hippocampus (L)                                                       |                      | 3.408        | 0.002305 | 11            | -16          | -12          | -12          |
| Ventral tegmental area (L)                                            |                      | 4.102        | 0.000212 | 51            | -10          | -24          | -28          |
| Ventral tegmental area (R)                                            | 30                   | 3.814        | 0.000600 | 30            | 12           | -24          | -22          |
| Postcentral gyrus, lateral part (L)                                   | 3                    | 3.861        | 0.000509 | 14            | -50          | -24          | 60           |
| Supramarginal gyrus extending to superior temporal gyrus (L)          | 48                   | 3.888        | 0.000464 | 95            | -60          | -26          | 22           |
| Thalamus (L)                                                          | 50                   | 3.931        | 0.000400 | 42            | -14          | -28          | -6           |
| White matter (middle cerebellar peduncles)                            |                      | 3.614        | 0.001188 | 13            | 14           | -30          | -34          |
| Precuneus (L)                                                         |                      | 3.744        | 0.000764 | 14            | -14          | -50          | 58           |
| Cerebellum lobule VIII (R)                                            |                      | 3.568        | 0.001378 | 15            | 8            | -62          | -34          |
| Middle occipital gyrus (L)                                            | 19                   | 4.292        | 0.000103 | 49            | -22          | -88          | 18           |
| Middle occipital gyrus (L, R)                                         | 18                   | 3.736        | 0.000785 | 11            | -28          | -98          | -6           |
| <b>Equitable &gt; selfish decisions (increased activity)</b>          |                      |              |          |               |              |              |              |
| <b>Region</b>                                                         | <b>Brodmann Area</b> | <b>SDM-Z</b> | <b>P</b> | <b>Voxels</b> | <b>MNI-x</b> | <b>MNI-y</b> | <b>MNI-z</b> |

|                                                                  |        |       |          |     |     |     |     |
|------------------------------------------------------------------|--------|-------|----------|-----|-----|-----|-----|
| Inferior frontal gyrus, triangular part (L)                      | 45     | 2.366 | 0.000113 | 305 | -48 | 42  | 8   |
| Middle frontal gyrus (R)                                         | 45     | 2.093 | 0.000468 | 205 | 48  | 40  | 20  |
| Middle frontal gyrus extending to superior orbital gyrus (R)     | 10, 11 | 2.391 | 0.000098 | 234 | 30  | 38  | -12 |
| Anterior cingulate cortex extending to paracingulate gyri (L, R) | 11     | 2.731 | 0.000014 | 488 | -2  | 32  | -10 |
| Inferior frontal gyrus, orbital part (L)                         | 11     | 2.302 | 0.000158 | 24  | -24 | 26  | -16 |
| Superior frontal gyrus, medial part (R)                          | 8      | 1.957 | 0.000904 | 18  | 8   | 26  | 48  |
| Inferior frontal gyrus, opercular part (R)                       | 44     | 1.996 | 0.000748 | 36  | 60  | 16  | 14  |
| Striatum (L)                                                     |        | 1.994 | 0.000752 | 68  | -6  | -6  | -8  |
| Middle occipital gyrus (L)                                       | 18     | 2.39  | 0.000099 | 113 | -18 | -98 | -2  |

---

**Equitable < selfish decisions (decreased activity)**

| <b>Region</b>                                   | <b>Brodmann Area</b> | <b>SDM-Z</b> | <b>P</b> | <b>Voxels</b> | <b>MNI-x</b> | <b>MNI-y</b> | <b>MNI-z</b> |
|-------------------------------------------------|----------------------|--------------|----------|---------------|--------------|--------------|--------------|
| Middle frontal gyrus (L)                        | 46                   | -2.534       | 0.000820 | 125           | -22          | 42           | 26           |
| Rolandic operculum (L)                          |                      | -2.341       | 0.001943 | 36            | -52          | 0            | 16           |
| Inferior temporal gyrus (L)                     | 20                   | -2.548       | 0.000771 | 15            | -48          | -2           | -32          |
| Precentral gyrus (R)                            | 6                    | -2.533       | 0.000827 | 32            | 48           | -4           | 40           |
| Supplementary motor area (L)                    | 6                    | -2.831       | 0.000197 | 252           | -6           | -4           | 68           |
| Precentral gyrus (L)                            | 6                    | -2.546       | 0.000778 | 27            | -50          | -8           | 52           |
| Precentral gyrus (L)                            | 6                    | -2.518       | 0.000883 | 17            | -38          | -12          | 40           |
| Caudate nucleus (R)                             |                      | -3.431       | 0.000007 | 91            | 18           | -16          | 24           |
| Precentral gyrus (L)                            | 6                    | -2.355       | 0.001822 | 34            | -30          | -18          | 60           |
| Inferior temporal gyrus (L)                     | 20                   | -2.449       | 0.001206 | 12            | -44          | -18          | -24          |
| Thalamus extending to caudate (L)               |                      | -3.007       | 0.000079 | 288           | -14          | -20          | 20           |
| Posterior insula (R)                            |                      | -3.078       | 0.000054 | 27            | 32           | -28          | 18           |
| Supramarginal gyrus (R)                         | 48                   | -2.651       | 0.000474 | 70            | 54           | -36          | 28           |
| Posterior cingulate cortex, ventral portion (R) | 30                   | -2.347       | 0.001894 | 10            | 14           | -38          | 6            |

|                                                            |    |        |          |     |     |     |     |
|------------------------------------------------------------|----|--------|----------|-----|-----|-----|-----|
| Posterior superior temporal sulcus (R)                     | 39 | -3.021 | 0.000073 | 65  | 48  | -40 | -2  |
| Supramarginal gyrus (L)                                    | 48 | -2.581 | 0.000663 | 84  | -50 | -40 | 28  |
| Inferior temporal gyrus (L)                                | 20 | -3.117 | 0.000043 | 105 | -42 | -44 | -10 |
| Posterior superior temporal sulcus (R)                     | 39 | -2.428 | 0.001329 | 11  | 44  | -48 | 12  |
| Postcentral gyrus (L)                                      | 5  | -2.937 | 0.000113 | 182 | -20 | -52 | 64  |
| Posterior superior temporal sulcus (L)                     | 39 | -2.592 | 0.000627 | 27  | -40 | -60 | 12  |
| Extrastriate cortex extending to parahippocampal gyrus (R) | 36 | -3.239 | 0.000021 | 211 | 30  | -62 | 6   |
| Primary visual cortex (L)                                  | 17 | -2.488 | 0.00101  | 57  | -24 | -68 | 8   |

---

**Altruistic > selfish decisions (increased activity)**

| Region                                                                                            | Brodmann Area | SDM-Z | P        | Voxels | MNI-x | MNI-y | MNI-z |
|---------------------------------------------------------------------------------------------------|---------------|-------|----------|--------|-------|-------|-------|
| Middle orbital gyrus (L)                                                                          |               | 3.397 | 0.000130 | 200    | -38   | 44    | 0     |
| Middle frontal gyrus (R)                                                                          | 45            | 2.827 | 0.001091 | 31     | 46    | 40    | 28    |
| Anterior cingulate cortex extending to paracingulate gyri and pre-supplementary motor area (L, R) | 32            | 3.871 | 0.000021 | 1278   | 10    | 36    | 22    |
| Gyrus rectus, ventromedial (L, R)                                                                 | 11            | 2.564 | 0.002750 | 10     | -2    | 30    | -18   |
| Middle frontal gyrus (L)                                                                          | 44            | 3.761 | 0.000031 | 568    | -40   | 24    | 32    |
| Anterior insula (L)                                                                               | 48            | 3.961 | 0.000014 | 203    | -34   | 20    | 8     |
| Anterior insula (R)                                                                               | 48            | 2.923 | 0.000773 | 64     | 30    | 18    | 6     |
| Inferior frontal gyrus, orbital part (L)                                                          | 38            | 2.982 | 0.000624 | 12     | -24   | 12    | -24   |
| Ventral striatum (R)                                                                              |               | 3.15  | 0.000331 | 50     | 14    | 2     | -8    |
| Thalamus (L)                                                                                      |               | 2.814 | 0.001146 | 40     | -6    | -6    | 0     |
| Thalamus (L)                                                                                      |               | 2.803 | 0.001191 | 23     | -14   | -30   | 16    |
| Inferior parietal (excluding supramarginal and angular) gyri (L)                                  | 40            | 3.917 | 0.000017 | 705    | -40   | -54   | 50    |
| Inferior parietal (excluding supramarginal and angular) gyri (R)                                  | 40            | 3.105 | 0.000394 | 219    | 42    | -56   | 52    |

|                              |    |       |          |     |     |     |    |
|------------------------------|----|-------|----------|-----|-----|-----|----|
| Precuneus (L)                | 7  | 2.83  | 0.001082 | 13  | -4  | -60 | 38 |
| Precuneus (R)                | 7  | 2.96  | 0.000673 | 26  | 6   | -70 | 44 |
| Middle occipital gyrus (L)   | 18 | 2.761 | 0.001381 | 194 | -22 | -96 | 0  |
| Inferior occipital gyrus (R) | 18 | 2.594 | 0.002483 | 65  | 24  | -96 | -6 |

---

**Altruistic < selfish decisions (decreased activity)**

| Region                                                         | Brodmann Area | SDM-Z  | P        | Voxels | MNI-x | MNI-y | MNI-z |
|----------------------------------------------------------------|---------------|--------|----------|--------|-------|-------|-------|
| Superior frontal gyrus, dorsolateral (R)                       | 9             | -2.602 | 0.002379 | 13     | 18    | 50    | 30    |
| Inferior frontal gyrus, pars triangularis part (R)             | 48            | -3.033 | 0.000539 | 104    | 48    | 34    | 6     |
| Rolandic operculum (L)                                         | 6, 48         | -3.372 | 0.000147 | 38     | -56   | 0     | 8     |
| Posterior insula (L)                                           | 84            | -2.627 | 0.002198 | 15     | -42   | 0     | 8     |
| Anterior superior temporal sulcus (R)                          |               | -3.524 | 0.000080 | 69     | 48    | -2    | -14   |
| Putamen (lenticular nucleus) (R)                               | 48            | -2.541 | 0.002913 | 10     | 30    | -8    | 2     |
| Posterior insula (R)                                           | 48            | -3.902 | 0.000016 | 780    | 42    | -10   | 2     |
| Superior frontal gyrus, dorsolateral (R)                       | 6             | -3.119 | 0.000394 | 13     | 18    | -10   | 72    |
| Posterior insula (L)                                           | 48            | -4.006 | 0.000010 | 70     | -38   | -14   | 6     |
| Inferior temporal gyrus (L)                                    | 20            | -3.238 | 0.000252 | 12     | -42   | -14   | -28   |
| Middle temporal gyrus (R)                                      | 21            | -4.377 | 0.000002 | 232    | 58    | -24   | -8    |
| Inferior temporal gyrus extending to parahippocampal gyrus (L) | 20            | -3.175 | 0.000317 | 32     | -42   | -26   | -18   |
| Postcentral gyrus, medial (R)                                  | 3             | -2.787 | 0.001283 | 15     | 32    | -34   | 50    |
| Postcentral gyrus, medial (L)                                  | 3             | -3.018 | 0.000567 | 18     | -36   | -38   | 56    |
| Fusiform gyrus (L)                                             | 37            | -3.181 | 0.000311 | 88     | -22   | -44   | -18   |
| Middle temporal gyrus (R)                                      |               | -3.156 | 0.000342 | 195    | 48    | -48   | 0     |
| Superior parietal gyrus (R)                                    | 5             | -3.479 | 0.000096 | 195    | 14    | -50   | 70    |
| Middle temporal gyrus (L)                                      | 37            | -4.052 | 0.000008 | 764    | -44   | -68   | 6     |
| Middle temporal gyrus (R)                                      | 37            | -3.774 | 0.000029 | 136    | 42    | -70   | 14    |
| Cerebellum, crus I extending to crus II (L)                    |               | -2.648 | 0.002050 | 11     | -22   | -82   | -30   |

---

432

## Discussion

433

Using data from 43 unique fMRI studies that included 25 statistical maps and 18

434

coordinate tables across 1,423 subjects, we identified 13 features that distinguish prosocial

435

decisions tasks. We used these features to generate a feature-based representation of prosocial

436

decision tasks that classified prosocial decisions into three sub-clusters that we labeled

437

cooperation, equity, and altruism. That the feature-based structure we generated identifies

438

conceptually and motivationally coherent categories of prosocial decisions was supported by the

439

results of our fMRI meta-analysis, which found evidence suggesting that each category of

440

decision recruits diverging neural systems. Cooperative decisions primarily recruited regions

441

such as dorsal and ventral striatum, VTA, and subgenual ACC. Equitable decisions recruited

442

neural regions such as ventral striatum, dorsolateral PFC, and ventromedial PFC. Altruistic

443

decisions recruited neural regions such as ventral striatum, dorsolateral PFC, ventromedial PFC,

444

pre-SMA, dorsal ACC, and anterior insula.

445

Our approach demonstrates that the dozens of tasks that have been used to assess the

446

neural correlates of prosocial decisions generally cluster together according to specific shared

447

features. These tasks are adaptations of those used in studies of prosocial decision making

448

outside the scanner and more broadly. We identified key features that distinguish prosocial

449

decisions, including features related to the identity of the beneficiary, the nature of the interaction

450

between agents and beneficiaries, and various outcomes associated with the decision. Then,

451

using an unsupervised graph-based approach, we identified three clusters of tasks that tend to

452

share common core features. For example, most cooperative decisions included outcomes that

453

depended on the decisions of others, repeated interactions between the agent and beneficiaries,

454

and decisions in conditions of uncertainty. Features shared by most equitable decisions included

455 adherence to social norms such as producing equal outcomes, and unilateral decisions made by a  
456 single agent and that thus resulted in no uncertainty. Features shared by most altruistic decisions  
457 included outcomes that did not produce any benefit to the deciding agent and decisions that were  
458 made in response to the need or distress of the beneficiaries. Of note, the prosocial decision-  
459 making tasks included in this meta-analysis were described by the original authors using at least  
460 10 different terms that did not consistently correspond to the features of the tasks being used—  
461 including cooperation, collaboration, reciprocity, trust, equity, fairness, prosocial behavior,  
462 interpersonal behavior, charitable behavior, and altruism—reinforcing the value of a clearer and  
463 more consistent prosocial decision-making task-space.

464         Supporting the identified task structure, the clusters yielded by our approach map closely  
465 onto the results of a previous behavioral characterization of prosocial paradigms that applied  
466 factor analysis to the behavioral outcomes of these paradigms (Böckler et al., 2016). These  
467 outcomes included the percentage of prosocial decisions during tasks, the ratio of other-regarding  
468 versus self-regarding decisions, average monetary donations, or summary scores of self-reported  
469 measures. Using a similar bottom-up, but otherwise completely distinct approach across 329  
470 participants who completed multiple tasks assessing prosocial behavior, the authors identified  
471 clusters of prosocial tasks that correspond to those we identified: altruistically motivated  
472 prosocial behavior (corresponding to altruistic decisions), norm-motivated prosocial behavior  
473 (corresponding to equitable decisions), and strategically motivated prosocial behavior  
474 (corresponding to cooperative decisions). They also identified self-reported prosocial behavior (a  
475 category not included in our meta-analysis) as comprising a fourth distinct cluster.

476         Our findings also extend this work by showing that tasks cluster similarly even when  
477 completed by different participants across tasks. This suggests task features are crucial in

478 determining the category of a prosocial decision and has implications for comparing results  
479 across different tasks, such as in previous meta-analyses. In addition, our findings suggest that  
480 even within a type of task, specific features may determine the category of prosocial decision at  
481 hand. For example, Dictator Games that offered an option to split available resources equally  
482 (50-50) clustered with equitable decisions, whereas Dictator Games with the option to make  
483 other prosocial splits clustered with altruistic decisions. The existence of strong norms related to  
484 equity may explain why 50-50 is the most common non-selfish split across Dictator Games when  
485 this choice is available (Engel, 2011). Future analyses of Dictator Game tasks, particularly those  
486 conducted using fMRI, could benefit from considering that there may be something unique about  
487 the decision to split resources equally (50%) rather than it simply existing as an option on a  
488 parametric continuum between 49% and 51%.

489         Our approach also yielded several important observations about the neural substrates of  
490 prosocial decisions. Notably, all three clusters of prosocial decisions recruited the striatum, a  
491 region consistently found to encode action value during learning and decision-making (Daw &  
492 Doya, 2006; Guitart-Masip et al., 2014). However, each category of decisions elicited activation  
493 in different regions within the striatum, possibly because actions varied across tasks. In some  
494 tasks (primarily cooperative and equitable decisions), prosocial decisions increased the agent's  
495 own welfare. In other tasks (primarily altruistic and equitable decisions), prosocial decisions  
496 meant forgoing resources. We found that cooperation recruited the left caudate and bilateral  
497 ventral striatum, equity recruited right caudate and bilateral ventral striatum, and altruism  
498 recruited right ventral striatum. The only overlap of striatal activation we identified occurred in a  
499 small volume of four voxels during both cooperative and equitable decisions. This conjunction

500 may reflect the fact that cooperative and equitable decisions benefit both agents and  
501 beneficiaries, which may be recapitulated in ventral striatal activity.

502         This suggests the possibility of an additive effect of striatal activity—an interpretation  
503 consistent with observations of a parametric effect of striatal activation and reward magnitude for  
504 self (Miller et al., 2014). Ventral striatum is also preferentially engaged in response to rewarding  
505 social stimuli relative to rewarding nonsocial stimuli, for instance, when participants cooperate  
506 with a human partner relative to a computer partner despite identical monetary gains (Rilling et  
507 al., 2002, 2004). This also might explain why we did not observe any regions that were more  
508 active during selfish decisions than cooperative decisions. Cooperative decisions, which yield  
509 outcomes benefiting both the agent and other beneficiaries, are potentially more rewarding than  
510 decisions that only yield self-rewarding outcomes. Cooperative decisions also uniquely recruited  
511 activity in bilateral VTA, which projects dopamine to the ventral striatum in response to positive  
512 prediction errors and reward cues (D’Ardenne et al., 2008), and activity in which likely reflects  
513 the anticipation of both the self- and social-rewards gained from cooperating with others.

514         Striatal activation to anticipatory reward cues occurs within a larger subjective valuation  
515 system, which consistently involves activity in the medial PFC during reward-based decision-  
516 making (Bartra et al., 2013) and prosocial decision-making (Bellucci et al., 2020; Cutler &  
517 Campbell-Meiklejohn, 2019). As has been previously found (Cutler & Campbell-Meiklejohn,  
518 2019), we observed activation in more anterior portions of the ventromedial PFC (including the  
519 rostral ACC) during equitable decisions which produce self-enhancing, norm-based outcomes  
520 and activation in more posterior portions during altruistic decisions. These results are consistent  
521 with a hypothesized spatial gradient of activation along the medial PFC during prosocial



522 decision-making (Sul et al., 2015), which may integrate information about self and others to  
523 encode an overall value during a prosocial decision (Hutcherson et al., 2015).

524       Activation in both ventral striatum and medial PFC did not overlap between altruistic  
525 decisions and cooperative decisions. In contrast to altruistic decisions, which recruited the  
526 lingual gyrus portion of left ventromedial PFC, we found activation in bilateral subgenual ACC  
527 during tasks that require agents to cooperate with others to achieve a common goal. This  
528 suggests that altruistic and cooperative decision represent distinct processes, despite frequent  
529 conflation these two categories of decisions in the literature, for example, when altruistic  
530 behavior (choosing to benefit others without any self-gain) is labeled "cooperation" (Balliet et  
531 al., 2014; Declerck et al., 2013; Gintis, 2014; Peysakhovich et al., 2014; Yang et al., 2019).  
532 Because the subgenual ACC supports prosocial learning computations (Christopoulos & King-  
533 Casas, 2014; Lockwood et al., 2016) as well as preferences for socially rewarding outcomes  
534 (Smith et al., 2010), it may also play a role in updating expectations of others' actions or the  
535 value of others' outcomes during iterative cooperative decision-making.

536       In addition to a subjective-valuation sub-system, altruistic decisions seemed to recruit  
537 two other distinct sub-systems underlying goal-directed behavior and empathy, respectively. The  
538 goal-directed sub-system included regions typically implicated in controlling action and directing  
539 goal-directed behaviors, including the lateral PFC (Hoshi & Tanji, 2004; Kaller et al., 2011;  
540 Morris et al., 2014). Importantly, activation for equitable and altruistic decision-making  
541 overlapped in dorsolateral PFC, involved in modulating subjective value representations  
542 (Carlson & Crockett, 2018; Tusche & Hutcherson, 2018) and in making norm-related decisions  
543 (Baumgartner et al., 2011; Knoch et al., 2006). Thus, it may play an important role in guiding

544 prosocial action in accordance with abstract, social rules during social decision-making tasks  
545 (Bellucci et al., 2020).

546         The second sub-system comprised regions commonly involved in representing and  
547 empathizing with the distress of others, and included the dorsal ACC, pre-SMA, and anterior  
548 insula (Ashar et al., 2017; Decety & Lamm, 2006; Lamm et al., 2011). Activation in these  
549 regions emerged only during altruistic decisions, consistent with the theory that affective  
550 resonance with others' distress give rise to empathic concern and altruistic motivation, which is a  
551 primary motivator of prosocial behavior in the absence of cooperative or equity-maintaining  
552 goals (Batson, 2009, 2011; Brethel-Haurwitz et al., 2018; Decety et al., 2016; O'Connell et al.,  
553 2019). This finding was likely driven by eight out of the fourteen identified altruistic studies  
554 including stimuli that depicted or implied the need or distress of beneficiaries. We also found  
555 activation in the precuneus—a key node of the mentalizing system (Koster-Hale et al., 2017)—  
556 during altruistic decisions. This region has also been found to be active in response to observing  
557 emotional suffering (Immordino-Yang et al., 2009; Masten et al., 2011; Meyer et al., 2013).  
558 Although some hypothesize the right TPJ—another core region of the mentalizing system—to be  
559 recruited during prosocial decision-making (Chakroff & Young, 2014; Parnamets et al., 2020),  
560 we did not find differential activation in this region across prosocial relative to selfish decisions.  
561 It is possible that we did not observe differences in mean activation because both selfish and  
562 prosocial decisions require the maintenance of others' beliefs and intentions, whereas studies  
563 finding TPJ activation usually contrast decisions pertaining to other people with hypothetical  
564 decisions pertaining to imaginary people (or computers) (FeldmanHall et al., 2012).

## 565 **Limitations and Future Directions**

566         These results should be considered in light of some limitations. We could not obtain  
567 complete data from a number of potentially relevant studies. At least 69 studies would have been  
568 eligible for the analysis if we had been able to retrieve the necessary data. In addition, while the  
569 13 features we identified captured the distinctions across the tasks included in our analysis, they  
570 may not be representative of all features that could potentially overlap across tasks. With access  
571 to more data, future work could test how clustering algorithms such as the one we employed can  
572 generalize to unseen tasks with different combinations of features, or even generate new tasks  
573 with unique sets of task features.

574         We identified how tasks were inter-related using a bottom-up feature-based approach  
575 (assuming equally important features), and how these inter-relationships give rise to overarching  
576 prosocial categories. This is in contrast to the more top-down approaches based on expert-models  
577 that have been used to map cognitive constructs like creativity and control onto tasks (Kenett et  
578 al., 2020; Lenartowicz et al., 2010). Future work could combine these approaches to generate a  
579 finer-grained task-space for prosocial decision-making including all possible levels of its  
580 cognitive ontology: the categories identified in the present study, finer-detailed sub-categories,  
581 task paradigms and their features weighted according to their relative importance, and contrast  
582 estimates. In so doing, we could go further in solving discrepancies within the prosocial  
583 decision-making literature, such as delineating more specific categories of prosocial decision-  
584 making within the identified task-space, which may only reflect the top level of a prosocial  
585 decision-making hierarchy. For example, active decisions to forgive (Fourie et al., 2020), norm-  
586 enforcing decisions (i.e., social influence on agreements or valuation) (Chang & Sanfey, 2013;  
587 Wu et al., 2016; Yang et al., 2019; Zinchenko & Arsalidou, 2018), and third-party altruistic

588 punishment decisions for norm violations (Buckholtz et al., 2008; David et al., 2017; Fehr et al.,  
589 2004; Jordan et al., 2016) were not considered in this study because we sought to only examine  
590 decisions that directly benefited another person, but may reflect more specific prosocial  
591 decisions under the umbrella of the identified categories.

592         As with many neuroimaging tasks, prosocial decision-making tasks adapted for  
593 neuroimaging are tightly controlled, and often designed to minimize variability and maximize  
594 the statistical power of detecting effects. However, they are not designed with high ecological  
595 validity and may not map onto the contexts of real-world prosocial decisions such as holding a  
596 door open, splitting a meal, volunteering, or donating blood or an organ. Instead, they are  
597 primarily monetary in nature, repetitive, and may increase behaviors related to social desirability  
598 in the laboratory (Richman et al., 1999). Recent work has focused on making neuroimaging  
599 paradigms more "naturalistic," such as viewing or listening to narratives or interacting in real-  
600 time with another person in the laboratory (Hasson & Frith, 2016; Redcay & Moraczewski,  
601 2019; Redcay & Schilbach, 2019; Wheatley et al., 2019) or in the real-world (Dikker et al.,  
602 2019). Other work has concentrated on characterizing the behavioral and neural features of  
603 individuals who engage in extreme forms of real-world prosociality (Brethel-Haurwitz et al.,  
604 2018; Marsh et al., 2014; O'Connell et al., 2019; Vekaria et al., 2020). Understanding the  
605 neurobiology underlying more ecologically-valid altruistic decisions will be crucial for  
606 understanding the broader picture of prosocial decision-making.

607         Related to this, we were not able to consider how individual differences in phenotypic  
608 traits may contribute to the neural activity patterns observed across prosocial decision-making  
609 tasks due to the limited number of studies that collect or report consistent data on participant  
610 characteristics, yet this remains an open question. Finally, we only considered univariate maps

611 that contrasted prosocial versus selfish decisions (or assessed a parametric increase). Due to the  
612 high variability of contrasts across studies, this allowed us to generate consistent neuroimaging  
613 contrasts that only indexed activation during the decision phase across studies. This approach is  
614 distinct from other meta-analytic work compiling coordinate-based maps across any contrasts in  
615 prosocial tasks (Bellucci et al., 2020; Yang et al., 2019), which run the risk of creating  
616 dependence across experiment maps that negatively impacts the validity of meta-analytic results  
617 (Müller et al., 2018). Ideally, future work would incorporate neural activation maps derived from  
618 computational modeling of behavior (Charpentier & O’Doherty, 2018; Lockwood et al., 2020;  
619 Lockwood & Klein-Flügge, 2020; Suzuki & O’Doherty, 2020; Tognoli et al., 2017), which holds  
620 promise for understanding individual differences in social learning and decision-making (Patzelt  
621 et al., 2018). For example, computational modeling of decisions can identify latent subjective  
622 states (e.g., mood, anxiety), beliefs about others (e.g., trust, morality), or other subjective biases  
623 about agents that are not directly observable from behavior. Thus, mapping these latent  
624 parameters onto the task features that give rise to them and their neural representations will be a  
625 necessary next step in characterizing a cognitive ontology of prosociality.

## 626 **Conclusion**

627 Despite limitations, the present study provides a framework for understanding how  
628 prosocial decisions are inter-related and distinct, and can be applied to a variety of experimental  
629 task paradigms. Using a bottom-up approach, we identified a feature-based representation of the  
630 task-space underlying prosocial decisions. Results revealed that three clusters of prosocial  
631 decisions identified this way—cooperative, equitable, and altruistic decisions—recruit neural  
632 systems that diverge in ways that shed light on the key motivations and mechanisms that support  
633 each category of prosocial decision compared to selfish decisions. These findings clarify some of

634 the existing heterogeneity in how prosociality is conceptualized and generate insight for future  
635 research in task paradigm development and the improvement of formal cognitive ontologies.

636

637

638

639

640

641

642

643

644

645

646

647

648

649

650

651

652

653

654

655

656  
657  
658  
659  
660  
661  
662  
663  
664  
665  
666  
667  
668  
669  
670  
671  
672  
673  
674  
675  
676  
677  
678

## References

- Abe, M. O., Koike, T., Okazaki, S., Sugawara, S. K., Takahashi, K., Watanabe, K., & Sadato, N. (2019). Neural correlates of online cooperation during joint force production. *NeuroImage*, *191*, 150–161. <https://doi.org/10.1016/j.neuroimage.2019.02.003>
- Aimone, J. A., Houser, D., & Weber, B. (2014). Neural signatures of betrayal aversion: An fMRI study of trust. *Proceedings of the Royal Society B: Biological Sciences*, *281*(1782). <https://doi.org/10.1098/rspb.2013.2127>
- Aknin, L. B., Dunn, E. W., & Norton, M. I. (2012). Happiness Runs in a Circular Motion: Evidence for a Positive Feedback Loop between Prosocial Spending and Happiness. *Journal of Happiness Studies*, *13*(2), 347–355. <https://doi.org/10.1007/s10902-011-9267-5>
- Ashar, Y. K., Andrews-Hanna, J. R., Dimidjian, S., & Wager, T. D. (2017). Empathic Care and Distress: Predictive Brain Markers and Dissociable Brain Systems. *Neuron*, *94*(6), 1263–1273.e4. <https://doi.org/10.1016/j.neuron.2017.05.014>
- Balliet, D., Mulder, L. B., & Van Lange, P. A. M. (2011). Reward, punishment, and cooperation: A meta-analysis. *Psychological Bulletin*, *37*(4), 594–615. <https://doi.org/10.1037/a0023489>
- Balliet, D., Wu, J., & De Dreu, C. K. W. (2014). Ingroup favoritism in cooperation: a meta-analysis. *Psychological Bulletin*, *140*(6), 1556–1581. <https://doi.org/10.1037/a0037737>
- Bartra, O., McGuire, J. T., & Kable, J. W. (2013). The valuation system: A coordinate-based meta-analysis of BOLD fMRI experiments examining neural correlates of subjective value. *NeuroImage*, *76*, 412–427. <https://doi.org/10.1016/j.neuroimage.2013.02.063>
- Batson, C. D. (2009). These Things Called Empathy: Eight Related but Distinct Phenomena. In *The Social Neuroscience of Empathy* (pp. 4–14). <https://doi.org/10.7551/mitpress/9780262012973.003.0002>

- 679 Batson, C. D. (2011). Altruism in Humans. In *Altruism in Humans*. Oxford University Press.  
680 <https://doi.org/10.1093/acprof:oso/9780195341065.001.0001>
- 681 Batson, C. D., & Powell, A. A. (2003). Altruism and Prosocial Behavior. In *Handbook of*  
682 *Psychology*. <https://doi.org/10.1002/0471264385.wei0519>
- 683 Bault, N., Pelloux, B., Fahrenfort, J. J., Ridderinkhof, K. R., & Van Winden, F. (2014). Neural  
684 dynamics of social tie formation in economic decision-making. *Social Cognitive and*  
685 *Affective Neuroscience*, *10*(6), 877–884. <https://doi.org/10.1093/scan/nsu138>
- 686 Baumgartner, T., Knoch, D., Hotz, P., Eisenegger, C., & Fehr, E. (2011). Dorsolateral and  
687 ventromedial prefrontal cortex orchestrate normative choice. *Nature Neuroscience*, *14*(11),  
688 1468–1474. <https://doi.org/10.1038/nn.2933>
- 689 Bellucci, G., Camilleri, J. A., Eickhoff, S. B., & Krueger, F. (2020). Neural signatures of  
690 prosocial behaviors. *Neuroscience and Biobehavioral Reviews*, *118*, 186–195.  
691 <https://doi.org/10.1016/j.neubiorev.2020.07.006>
- 692 Bellucci, G., Chernyak, S. V., Goodyear, K., Eickhoff, S. B., & Krueger, F. (2017). Neural  
693 signatures of trust in reciprocity: A coordinate-based meta-analysis. *Human Brain Mapping*,  
694 *38*(3), 1233–1248. <https://doi.org/10.1002/hbm.23451>
- 695 Blondel, V., Guillaume, J., Lambiotte, R., & Lefebvre, E. (2008). Fast unfolding of community  
696 hierarchies in large networks. *Journal of Statistical Mechanics: Theory and Experiment*,  
697 *2008*(10), 1–12. <https://doi.org/10.1088/1742-5468/2008/10/P10008>
- 698 Böckler, A., Tusche, A., & Singer, T. (2016). The Structure of Human Prosociality:  
699 Differentiating Altruistically Motivated, Norm Motivated, Strategically Motivated, and  
700 Self-Reported Prosocial Behavior. *Social Psychological and Personality Science*, *7*(6), 530–  
701 541. <https://doi.org/10.1177/1948550616639650>



- 702 Brethel-Haurwitz, K. M., Cardinale, E. M., Vekaria, K. M., Robertson, E. L., Walitt, B.,  
703 VanMeter, J. W., & Marsh, A. A. (2018). Extraordinary Altruists Exhibit Enhanced Self-  
704 Other Overlap in Neural Responses to Distress. *Psychological Science*, *29*(10), 1–11.  
705 <https://doi.org/10.1177/0956797618779590>
- 706 Buckholtz, J. W., Asplund, C. L., Dux, P. E., Zald, D. H., Gore, J. C., Jones, O. D., & Marois, R.  
707 (2008). The Neural Correlates of Third-Party Punishment. *Neuron*, *60*(5), 930–940.  
708 <https://doi.org/10.1016/j.neuron.2008.10.016>
- 709 Burkart, J. M., Allon, O., Amici, F., Fichtel, C., Finkenwirth, C., Heschl, A., Huber, J., Isler, K.,  
710 Kosonen, Z. K., Martins, E., Meulman, E. J., Richiger, R., Rueth, K., Spillmann, B.,  
711 Wiesendanger, S., & Van Schaik, C. P. (2014). The evolutionary origin of human hyper-  
712 cooperation. *Nature Communications*, *5*(1), 1–9. <https://doi.org/10.1038/ncomms5747>
- 713 Carlson, R. W., & Crockett, M. J. (2018). The lateral prefrontal cortex and moral goal pursuit.  
714 *Current Opinion in Psychology*, *24*, 77–82. <https://doi.org/10.1016/j.copsyc.2018.09.007>
- 715 Chakroff, A., & Young, L. (2014). The prosocial brain: Perceiving others in need and acting on  
716 it. In L. M. Padilla-Walker & G. Carlo (Eds.), *Prosocial development: A multidimensional*  
717 *approach* (pp. 90–111). Oxford University Press.
- 718 Chang, L. J., & Sanfey, A. G. (2013). Great expectations: Neural computations underlying the  
719 use of social norms in decision-making. *Social Cognitive and Affective Neuroscience*, *8*(3),  
720 277–284. <https://doi.org/10.1093/scan/nsr094>
- 721 Charpentier, C. J., & O’Doherty, J. P. (2018). The application of computational models to social  
722 neuroscience: promises and pitfalls. *Social Neuroscience*, *13*(6), 637–647.  
723 <https://doi.org/10.1080/17470919.2018.1518834>
- 724 Chaudhuri, A. (2011). Sustaining cooperation in laboratory public goods experiments: A

- 725 selective survey of the literature. *Experimental Economics*, 14(1), 47–83.
- 726 <https://doi.org/10.1007/s10683-010-9257-1>
- 727 Chen, X., Hackett, P. D., DeMarco, A. C., Feng, C., Stair, S., Haroon, E., Ditzen, B., Pagnoni, G.,  
728 & Rilling, J. K. (2016). Effects of oxytocin and vasopressin on the neural response to  
729 unreciprocated cooperation within brain regions involved in stress and anxiety in men and  
730 women. *Brain Imaging and Behavior*, 10(2), 581–593. [https://doi.org/10.1007/s11682-015-](https://doi.org/10.1007/s11682-015-9411-7)  
731 [9411-7](https://doi.org/10.1007/s11682-015-9411-7)
- 732 Christopoulos, G. I., & King-Casas, B. (2014). With you or against you: Social orientation  
733 dependent learning signals guide actions made for others. *NeuroImage*, 104, 326–335.  
734 <https://doi.org/10.1016/j.neuroimage.2014.09.011>
- 735 Cox, R. W. (1996). AFNI: Software for analysis and visualization of functional magnetic  
736 resonance neuroimages. *Computers and Biomedical Research*, 29(3), 162–173.  
737 <https://doi.org/10.1006/cbmr.1996.0014>
- 738 Curry, O. S., Rowland, L. A., Van Lissa, C. J., Zlotowitz, S., McAlaney, J., & Whitehouse, H.  
739 (2018). Happy to help? A systematic review and meta-analysis of the effects of performing  
740 acts of kindness on the well-being of the actor. *Journal of Experimental Social Psychology*,  
741 76, 320–329. <https://doi.org/10.1016/j.jesp.2018.02.014>
- 742 Cutler, J., & Campbell-Meiklejohn, D. (2019). A comparative fMRI meta-analysis of altruistic  
743 and strategic decisions to give. *NeuroImage*, 184, 227–241.  
744 <https://doi.org/10.1016/j.neuroimage.2018.09.009>
- 745 D’Ardenne, K., McClure, S. M., Nystrom, L. E., Cohen, J. D., D’Ardenne, K., McClure, S. M.,  
746 Nystrom, L. E., & Cohen, J. D. (2008). BOLD responses reflecting dopaminergic signals in  
747 the human ventral tegmental area. *Science*, 319(5867), 1264–1267.

- 748 <https://doi.org/10.1126/science.1150605>
- 749 David, B., Hu, Y., Krüger, F., & Weber, B. (2017). Other-regarding attention focus modulates  
750 third-party altruistic choice: An fMRI study. *Scientific Reports*, 7, 1–12.  
751 <https://doi.org/10.1038/srep43024>
- 752 Daw, N. D., & Doya, K. (2006). The computational neurobiology of learning and reward.  
753 *Current Opinion in Neurobiology*, 16(2), 199–204.  
754 <https://doi.org/10.1016/j.conb.2006.03.006>
- 755 de Waal, F. B. M. (2008). Putting the altruism back into altruism: The evolution of empathy.  
756 *Annual Review of Psychology*, 59, 279–300.  
757 <https://doi.org/10.1146/annurev.psych.59.103006.093625>
- 758 Decety, J., Bartal, I. B. A., Uzefovsky, F., & Knafo-Noam, A. (2016). Empathy as a driver of  
759 prosocial behaviour: Highly conserved neurobehavioural mechanisms across species.  
760 *Philosophical Transactions of the Royal Society B: Biological Sciences*, 371(1686),  
761 20150077. <https://doi.org/10.1098/rstb.2015.0077>
- 762 Decety, J., Jackson, P. L., Sommerville, J. A., Chaminade, T., & Meltzoff, A. N. (2004). The  
763 neural bases of cooperation and competition: An fMRI investigation. *NeuroImage*, 23(2),  
764 744–751. <https://doi.org/10.1016/j.neuroimage.2004.05.025>
- 765 Decety, J., & Lamm, C. (2006). Human Empathy Through the Lens of Social Neuroscience. *The*  
766 *Scientific World Journal*, 6, 1146–1163. <https://doi.org/10.1100/tsw.2006.221>
- 767 Declerck, C. H., Boone, C., & Emonds, G. (2013). When do people cooperate? The  
768 neuroeconomics of prosocial decision making. *Brain and Cognition*, 81(1), 95–117.  
769 <https://doi.org/10.1016/j.bandc.2012.09.009>
- 770 Delgado, M. R., Frank, R. H., & Phelps, E. A. (2005). Perceptions of moral character modulate

- 771 the neural systems of reward during the trust game. *Nature Neuroscience*, 8(11), 1611–  
772 1618. <https://doi.org/10.1038/nn1575>
- 773 DerSimonian, R., & Laird, N. (1986). Meta-analysis in clinical trials. *Controlled Clinical Trials*,  
774 7(3), 177–188. [https://doi.org/10.1016/0197-2456\(86\)90046-2](https://doi.org/10.1016/0197-2456(86)90046-2)
- 775 Dice, L. R. (1945). Measures of the Amount of Ecologic Association Between Species. *Ecology*,  
776 26(3), 297–302. <https://doi.org/10.2307/1932409>
- 777 Dikker, S., Michalareas, G., Oostrik, M., Serafimaki, A., Kahraman, M., Struiksma, M. E., &  
778 Poeppel, D. (2019). Crowdsourcing neuroscience: inter-brain coupling during face-to-face  
779 interactions outside the laboratory. *BioRxiv*, 1–49.
- 780 Dunn, E. W., Aknin, L. B., & Norton, M. I. (2008). Spending money on others promotes  
781 happiness. *Science*, 319(5870), 1687–1688. <https://doi.org/10.1126/science.1150952>
- 782 Eickhoff, S. B., Laird, A. R., Grefkes, C., Wang, L. E., Zilles, K., & Fox, P. T. (2009).  
783 Coordinate-based activation likelihood estimation meta-analysis of neuroimaging data: A  
784 random-effects approach based on empirical estimates of spatial uncertainty. *Human Brain*  
785 *Mapping*, 30(9), 2907–2926. <https://doi.org/10.1002/hbm.20718>
- 786 Engel, C. (2011). Dictator games: A meta study. *Experimental Economics*, 14(4), 583–610.  
787 <https://doi.org/10.1007/s10683-011-9283-7>
- 788 Fareri, D. S., Chang, L. J., & Delgado, M. R. (2012). Effects of direct social experience on trust  
789 decisions and neural reward circuitry. *Frontiers in Neuroscience*, 6, 1–17.  
790 <https://doi.org/10.3389/fnins.2012.00148>
- 791 Fareri, D. S., Chang, L. J., & Delgado, M. R. (2015). Computational Substrates of Social Value  
792 in Interpersonal Collaboration. *Journal of Neuroscience*, 35(21), 8170–8180.  
793 <https://doi.org/10.1523/jneurosci.4775-14.2015>

- 794 Fehr, E., & Camerer, C. F. (2007). Social neuroeconomics: the neural circuitry of social  
795 preferences. *Trends in Cognitive Sciences*, *11*(10), 419–427.  
796 <https://doi.org/10.1016/j.tics.2007.09.002>
- 797 Fehr, E., & Fischbacher, U. (2003). The nature of human altruism. *Nature*, *425*(6960), 785–791.  
798 <https://doi.org/10.1038/nature02043>
- 799 Fehr, E., Fischbacher, U., & Gächter, S. (2002). Strong reciprocity, human cooperation, and the  
800 enforcement of social norms. *Human Nature*, *13*(1), 1–25. [https://doi.org/10.1007/s12110-](https://doi.org/10.1007/s12110-002-1012-7)  
801 [002-1012-7](https://doi.org/10.1007/s12110-002-1012-7)
- 802 Fehr, E., Rockenbach, B., Borst, A., & Schultz, W. (2004). Human altruism: economic, neural,  
803 and evolutionary perspectives. *Current Opinion in Neurobiology*, *14*(6), 784–790.  
804 <https://doi.org/10.1016/j.conb.2004.10.007>
- 805 Fehr, E., & Schmidt, K. M. (1999). A theory of fairness, competition, and cooperation. *The*  
806 *Quarterly Journal of Economics*, *114*(3), 817–868.
- 807 Fehr, E., & Schurtenberger, I. (2018). Normative foundations of human cooperation. *Nature*  
808 *Human Behaviour*, *2*(7), 458–468. <https://doi.org/10.1038/s41562-018-0385-5>
- 809 FeldmanHall, O. (2017). How Does Social Network Position Influence Prosocial Behavior?  
810 *Trends in Cognitive Sciences*, *21*(8), 572–573. <https://doi.org/10.1016/j.tics.2017.05.005>
- 811 FeldmanHall, O., Dalgleish, T., Evans, D., & Mobbs, D. (2015). Empathic concern drives costly  
812 altruism. *NeuroImage*, *105*, 347–356. <https://doi.org/10.1016/j.neuroimage.2014.10.043>
- 813 FeldmanHall, O., Dalgleish, T., Thompson, R., Evans, D., Schweizer, S., & Mobbs, D. (2012).  
814 Differential neural circuitry and self-interest in real vs hypothetical moral decisions. *Social*  
815 *Cognitive and Affective Neuroscience*, *7*(7), 743–751. <https://doi.org/10.1093/scan/nss069>
- 816 Fermin, A. S. R., Sakagami, M., Kiyonari, T., Li, Y., Matsumoto, Y., & Yamagishi, T. (2016).

817 Representation of economic preferences in the structure and function of the amygdala and  
818 prefrontal cortex. *Scientific Reports*, 6, 1–11. <https://doi.org/10.1038/srep20982>

819 Fouragnan, E., Chierchia, G., Greiner, S., Neveu, R., Avesani, P., & Coricelli, G. (2013).  
820 Reputational Priors Magnify Striatal Responses to Violations of Trust. *Journal of*  
821 *Neuroscience*, 33(8), 3602–3611. <https://doi.org/10.1523/jneurosci.3086-12.2013>

822 Fourie, M. M., Hortensius, R., & Decety, J. (2020). Parsing the components of forgiveness:  
823 Psychological and neural mechanisms. *Neuroscience and Biobehavioral Reviews*, 112, 437–  
824 451. <https://doi.org/10.1016/j.neubiorev.2020.02.020>

825 Fowler, J. H., & Christakis, N. A. (2010). Cooperative behavior cascades in human social  
826 networks. *Proceedings of the National Academy of Sciences*, 107(12), 5334–5338.  
827 <https://doi.org/10.1073/pnas.0913149107>

828 Garbarini, F., Boero, R., D’Agata, F., Bravo, G., Mosso, C., Cauda, F., Duca, S., Geminiani, G.,  
829 & Sacco, K. (2014). Neural correlates of gender differences in reputation building. *PLoS*  
830 *ONE*, 9(9), e106285. <https://doi.org/10.1371/journal.pone.0106285>

831 Genevsky, A., Vastfjall, D., Slovic, P., & Knutson, B. (2013). Neural Underpinnings of the  
832 Identifiable Victim Effect: Affect Shifts Preferences for Giving. *Journal of Neuroscience*,  
833 33(43), 17188–17196. <https://doi.org/10.1523/JNEUROSCI.2348-13.2013>

834 Gintis, H. (2014). The bounds of reason: Game theory and the unification of the behavioral  
835 sciences. In *The Bounds of Reason: Game Theory and the Unification of the Behavioral*  
836 *Sciences*. Princeton University Press. <https://doi.org/10.1080/10848770.2013.838043>

837 Greening, S., Norton, L., Virani, K., Ty, A., Mitchell, D., & Finger, E. (2014). Individual  
838 differences in the anterior insula are associated with the likelihood of financially helping  
839 versus harming others. *Cognitive, Affective and Behavioral Neuroscience*, 14(1), 266–277.

- 840 <https://doi.org/10.3758/s13415-013-0213-3>
- 841 Guitart-Masip, M., Duzel, E., Dolan, R., & Dayan, P. (2014). Action versus valence in decision  
842 making. *Trends in Cognitive Sciences*, 18(4), 194–202.  
843 <https://doi.org/10.1016/j.tics.2014.01.003>
- 844 Guroglu, B., Will, G. J., & Crone, E. A. (2014). Neural correlates of advantageous and  
845 disadvantageous inequity in sharing decisions. *PLoS ONE*, 9(9), 12–14.  
846 <https://doi.org/10.1371/journal.pone.0107996>
- 847 Güth, W., Schmittberger, R., & Schwarze, B. (1982). An experimental analysis of ultimatum  
848 bargaining. *Journal of Economic Behavior and Organization*, 3(4), 367–388.  
849 [https://doi.org/10.1016/0167-2681\(82\)90011-7](https://doi.org/10.1016/0167-2681(82)90011-7)
- 850 Hackel, L. M., Zaki, J., & Van Bavel, J. J. (2017). Social identity shapes social valuation:  
851 evidence from prosocial behavior and vicarious reward. *Social Cognitive and Affective  
852 Neuroscience*, 12(8), 1219–1228. <https://doi.org/10.1093/scan/nsx045>
- 853 Hare, B. (2017). Survival of the Friendliest: Homo Sapiens Evolved via Selection for  
854 Prosociality. *Annual Review of Psychology*, 68(1), 155–186.  
855 <https://doi.org/10.1146/annurev-psych-010416-044201>
- 856 Hare, T. A., Camerer, C. F., Knoepfle, D. T., O’Doherty, J. P., & Rangel, A. (2010). Value  
857 Computations in Ventral Medial Prefrontal Cortex during Charitable Decision Making  
858 Incorporate Input from Regions Involved in Social Cognition. *Journal of Neuroscience*,  
859 30(2), 583–590. <https://doi.org/10.1523/JNEUROSCI.4089-09.2010>
- 860 Hasson, U., & Frith, C. D. (2016). Mirroring and beyond: Coupled dynamics as a generalized  
861 framework for modelling social interactions. *Philosophical Transactions of the Royal  
862 Society B: Biological Sciences*, 371(1693), 20150366.



- 863 <https://doi.org/10.1098/rstb.2015.0366>
- 864 Henrich, J., Boyd, R., Bowles, S., Gintis, H., Fehr, E., Camerer, C., McElreath, R., Gurven, M.,  
865 Hill, K., Barr, A., Ensminger, J., Tracer, D., Marlow, F., Patton, J., Alvard, M., Gil-White, F.  
866 J., & Henrich, N. (2005). “Economic man” in cross-cultural perspective: Ethnography and  
867 experiments from 15 small-scale societies. *Behavioral and Brain Sciences*, 28(6), 795815.
- 868 Hill, P. F., Yi, R., Spreng, R. N., & Diana, R. A. (2017). Neural congruence between  
869 intertemporal and interpersonal self-control: Evidence from delay and social discounting.  
870 *NeuroImage*, 162, 186–198. <https://doi.org/10.1016/j.neuroimage.2017.08.071>
- 871 Hoshi, E., & Tanji, J. (2004). Area-selective neuronal activity in the dorsolateral prefrontal cortex  
872 for information retrieval and action planning. *Journal of Neurophysiology*, 91(6), 2707–  
873 2722. <https://doi.org/10.1152/jn.00904.2003>
- 874 Hutcherson, C. A., Bushong, B., & Rangel, A. (2015). A Neurocomputational Model of Altruistic  
875 Choice and Its Implications. *Neuron*, 87(2), 451–463.  
876 <https://doi.org/10.1016/j.neuron.2015.06.031>
- 877 Immordino-Yang, M. H., McColl, A., Damasio, H., & Damasio, A. (2009). Neural correlates of  
878 admiration and compassion. *Proceedings of the National Academy of Sciences*, 106(19),  
879 8021–8026. <https://doi.org/10.1073/pnas.0810363106>
- 880 Izuma, K., Saito, D. N., & Sadato, N. (2010). Processing of the incentive for social approval in  
881 the ventral striatum during charitable donation. *Journal of Cognitive Neuroscience*, 22(4),  
882 621–631. <https://doi.org/10.1162/jocn.2009.21228>
- 883 Jenni, K., & Loewenstein, G. (1997). Explaining the “Identifiable Victim Effect.” *Journal of Risk*  
884 *and Uncertainty*, 14(3), 235–257. <https://doi.org/10.1023/A:1007740225484>
- 885 Jones, B. A., & Rachlin, H. (2006). Social discounting. *Psychological Science*, 17(4), 283–286.



- 886 <https://doi.org/10.1111/j.1467-9280.2006.01699.x>
- 887 Jones, B. A., & Rachlin, H. (2009). Delay, Probability, and Social Discounting in A Public Goods  
888 Game. *Journal of the Experimental Analysis of Behavior*, *91*(1), 61–73.  
889 <https://doi.org/10.1901/jeab.2009.91-61>
- 890 Jordan, J. J., Hoffman, M., Bloom, P., & Rand, D. G. (2016). Third-party punishment as a costly  
891 signal of trustworthiness. *Nature*, *530*(7591), 473–476. <https://doi.org/10.1038/nature16981>
- 892 Kaller, C. P., Rahm, B., Spreer, J., Weiller, C., & Unterrainer, J. M. (2011). Dissociable  
893 contributions of left and right dorsolateral prefrontal cortex in planning. *Cerebral Cortex*,  
894 *21*(2), 307–317. <https://doi.org/10.1093/cercor/bhq096>
- 895 Kenett, Y. N., Kraemer, D. J. M., Alfred, K. L., Colaizzi, G. A., Cortes, R. A., & Green, A. E.  
896 (2020). Developing a neurally informed ontology of creativity measurement. *NeuroImage*,  
897 *221*, 117166. <https://doi.org/10.1016/j.neuroimage.2020.117166>
- 898 Knoch, D., Pascual-Leone, A., Meyer, K., Treyer, V., & Fehr, E. (2006). Diminishing reciprocal  
899 fairness by disrupting the right prefrontal cortex. *Science*, *314*(5800), 829–832.  
900 <https://doi.org/10.1126/science.1129156>
- 901 Koban, L., Pichon, S., & Vuilleumier, P. (2014). Responses of medial and ventrolateral prefrontal  
902 cortex to interpersonal conflict for resources. *Social Cognitive and Affective Neuroscience*,  
903 *9*(5), 561–569. <https://doi.org/10.1093/scan/nst020>
- 904 Kogut, T., & Ritov, I. (2005). The “identified victim” effect: An identified group, or just a single  
905 individual? *Journal of Behavioral Decision Making*, *18*(3), 157–167.  
906 <https://doi.org/10.1002/bdm.492>
- 907 Koster-Hale, J., Richardson, H., Velez, N., Asaba, M., Young, L., & Saxe, R. (2017). Mentalizing  
908 regions represent distributed, continuous, and abstract dimensions of others’ beliefs.

- 909 *NeuroImage*, 161, 9–18. <https://doi.org/10.1016/j.neuroimage.2017.08.026>
- 910 Krupka, E. L., & Weber, R. A. (2013). Identifying social norms using coordination games: Why  
911 does dictator game sharing vary? *Journal of the European Economic Association*, 11(3),  
912 495–524. <https://doi.org/10.1111/jeea.12006>
- 913 Kuss, K., Falk, A., Trautner, P., Elger, C. E., Weber, B., & Fliessbach, K. (2013). A reward  
914 prediction error for charitable donations reveals outcome orientation of donators. *Social*  
915 *Cognitive and Affective Neuroscience*, 8(2), 216–223. <https://doi.org/10.1093/scan/nsr088>
- 916 Kuss, K., Falk, A., Trautner, P., Montag, C., Weber, B., & Fliessbach, K. (2015). Neuronal  
917 correlates of social decision making are influenced by social value orientation-an fMRI  
918 study. *Frontiers in Behavioral Neuroscience*, 9(40), 1–8.  
919 <https://doi.org/10.3389/fnbeh.2015.00040>
- 920 Lamm, C., Decety, J., & Singer, T. (2011). Meta-analytic evidence for common and distinct  
921 neural networks associated with directly experienced pain and empathy for pain.  
922 *NeuroImage*, 54(3), 2492–2502. <https://doi.org/10.1016/j.neuroimage.2010.10.014>
- 923 Lee, M., Ahn, H. S., Kwon, S. K., & Kim, S. (2018). Cooperative and Competitive Contextual  
924 Effects on Social Cognitive and Empathic Neural Responses. *Frontiers in Human*  
925 *Neuroscience*, 12, 1–17. <https://doi.org/10.3389/fnhum.2018.00218>
- 926 Lee, S., & Feeley, T. H. (2016). The identifiable victim effect: a meta-analytic review. *Social*  
927 *Influence*, 11(3), 199–215. <https://doi.org/10.1080/15534510.2016.1216891>
- 928 Lelieveld, G. J., van Dijk, E., Güroğlu, B., van Beest, I., van Kleef, G. A., Rombouts, S. A. R. B.,  
929 & Crone, E. A. (2013). Behavioral and neural reactions to emotions of others in the  
930 distribution of resources. *Social Neuroscience*, 8(1), 52–62.  
931 <https://doi.org/10.1080/17470919.2012.735621>

- 932 Lenartowicz, A., Kalar, D. J., Congdon, E., & Poldrack, R. A. (2010). Towards an Ontology of  
933 Cognitive Control. *Topics in Cognitive Science*, 2(4), 678–692.  
934 <https://doi.org/10.1111/j.1756-8765.2010.01100.x>
- 935 Lockwood, P. L., Apps, M. A. J., & Chang, S. W. C. (2020). Is There a “Social” Brain?  
936 Implementations and Algorithms. *Trends in Cognitive Sciences*, 24(10), 802–813.  
937 <https://doi.org/10.1016/j.tics.2020.06.011>
- 938 Lockwood, P. L., Apps, M. A. J., Valton, V., Viding, E., & Roiser, J. P. (2016).  
939 Neurocomputational mechanisms of prosocial learning and links to empathy. *Proceedings of*  
940 *the National Academy of Sciences*, 113(35), 9763–9768.  
941 <https://doi.org/10.1073/pnas.1603198113>
- 942 Lockwood, P. L., & Klein-Flügge, M. (2020). Computational modelling of social cognition and  
943 behaviour—a reinforcement learning primer. *Social Cognitive and Affective Neuroscience*,  
944 1–11. <https://doi.org/10.1093/scan/nsaa040>
- 945 López-Pérez, R. (2008). Aversion to norm-breaking: A model. *Games and Economic Behavior*,  
946 64(1), 237–267. <https://doi.org/10.1016/j.geb.2007.10.009>
- 947 Marsh, A. A. (2016). Neural, cognitive, and evolutionary foundations of human altruism. *Wiley*  
948 *Interdisciplinary Reviews: Cognitive Science*, 7(1), 59–71. <https://doi.org/10.1002/wcs.1377>
- 949 Marsh, A. A., Stoycos, S. A., Brethel-Haurwitz, K. M., Robinson, P., VanMeter, J. W., &  
950 Cardinale, E. M. (2014). Neural and cognitive characteristics of extraordinary altruists.  
951 *Proceedings of the National Academy of Sciences*, 111(42), 15036–15041.  
952 <https://doi.org/10.1073/pnas.1408440111>
- 953 Masten, C. L., Morelli, S. A., & Eisenberger, N. I. (2011). An fMRI investigation of empathy for  
954 “social pain” and subsequent prosocial behavior. *NeuroImage*, 55(1), 381–388.

- 955 <https://doi.org/10.1016/j.neuroimage.2010.11.060>
- 956 Mayer, R. C., Davis, J. H., & Schoorman, F. D. (1995). An Integrative Model of Organizational  
957 Trust. *The Academy of Management Review*, 20(3), 709–734.  
958 <https://doi.org/10.2307/258792>
- 959 Meyer, M. L., Masten, C. L., Ma, Y., Wang, C., Shi, Z., Eisenberger, N. I., & Han, S. (2013).  
960 Empathy for the social suffering of friends and strangers recruits distinct patterns of brain  
961 activation. *Social Cognitive and Affective Neuroscience*, 8(4), 446–454.  
962 <https://doi.org/10.1093/scan/nss019>
- 963 Milinski, M., Semmann, D., Bakker, T. C. M., & Krambeck, H. J. (2001). Cooperation through  
964 indirect reciprocity: Image scoring or standing strategy? *Proceedings of the Royal Society*  
965 *B: Biological Sciences*, 268(1484), 2495–2501. <https://doi.org/10.1098/rspb.2001.1809>
- 966 Miller, E. M., Shankar, M. U., Knutson, B., & McClure, S. M. (2014). Dissociating Motivation  
967 from Reward in Human Striatal Activity. *Journal of Cognitive Neuroscience*, 26(5), 1075–  
968 1084. <https://doi.org/10.1162/jocn>
- 969 Mobbs, D., Yu, R., Meyer, M., Passamonti, L., Seymour, B., Calder, A. J., Schweizer, S., Frith,  
970 C. D., & Dalglish, T. (2009). A key role for similarity in vicarious reward. *Science*,  
971 324(5929), 900. <https://doi.org/10.1126/science.1170539>
- 972 Morishima, Y., Schunk, D., Bruhin, A., Ruff, C. C., & Fehr, E. (2012). Linking brain structure  
973 and activation in temporoparietal junction to explain the neurobiology of human altruism.  
974 *Neuron*, 75(1), 73–79. <https://doi.org/10.1016/j.neuron.2012.05.021>
- 975 Morris, R. W., Dezfouli, A., Griffiths, K. R., & Balleine, B. W. (2014). Action-value comparisons  
976 in the dorsolateral prefrontal cortex control choice between goal-directed actions. *Nature*  
977 *Communications*, 5(1), 1–10. <https://doi.org/10.1038/ncomms5390>

- 978 Müller, V. I., Cieslik, E. C., Laird, A. R., Fox, P. T., Radua, J., Mataix-Cols, D., Tench, C. R.,  
979 Yarkoni, T., Nichols, T. E., Turkeltaub, P. E., Wager, T. D., & Eickhoff, S. B. (2018). Ten  
980 simple rules for neuroimaging meta-analysis. *Neuroscience and Biobehavioral Reviews*, *84*,  
981 151–161. <https://doi.org/10.1016/j.neubiorev.2017.11.012>
- 982 Nowak, M. A. (2006). Five rules for the evolution of cooperation. *Science*, *314*(5805), 1560–  
983 1563. <https://doi.org/10.1126/science.1133755>
- 984 O’Connell, K., Brethel-Haurwitz, K. M., Rhoads, S. A., Cardinale, E. M., Vekaria, K. M.,  
985 Robertson, E. L., Walitt, B., Vanmeter, J. W., & Marsh, A. A. (2019). Increased similarity of  
986 neural responses to experienced and empathic distress in costly altruism. *Scientific Reports*,  
987 *9*(10774), 1–11. <https://doi.org/10.1038/s41598-019-47196-3>
- 988 Park, B. K., Blevins, E., Knutson, B., & Tsai, J. L. (2017). Neurocultural evidence that ideal  
989 affect match promotes giving. *Social Cognitive and Affective Neuroscience*, *12*(7), 1083–  
990 1096. <https://doi.org/10.1093/scan/nsx047>
- 991 Parnamets, P., Shuster, A., Reiner, D. A., & Van Bavel, J. J. (2020). A value-based framework  
992 for understanding cooperation. *Psychological Science*, *29*(3), 227–234.  
993 <https://doi.org/10.1177/0963721420906200>
- 994 Patzelt, E. H., Hartley, C. A., & Gershman, S. J. (2018). Computational Phenotyping: Using  
995 Models to Understand Individual Differences in Personality, Development, and Mental  
996 Illness. *Personality Neuroscience*, *1*, 1–9. <https://doi.org/10.1017/pen.2018.14>
- 997 Peysakhovich, A., Nowak, M. A., & Rand, D. G. (2014). Humans display a “cooperative  
998 phenotype” that is domain general and temporally stable. *Nature Communications*, *5*(1), 1–  
999 8. <https://doi.org/10.1038/ncomms5939>
- 1000 Poldrack, R. A., & Yarkoni, T. (2016). From Brain Maps to Cognitive Ontologies: Informatics

- 1001           and the Search for Mental Structure. *Annual Review of Psychology*, 67(1), 587–612.
- 1002           <https://doi.org/10.1146/annurev-psych-122414-033729>
- 1003   Preston, S. D., & de Waal, F. B. M. (2002). Empathy: Its ultimate and proximate bases.
- 1004           *Behavioral and Brain Sciences*, 25(1), 1–20. <https://doi.org/10.1017/S0140525X02000018>
- 1005   Radua, J., Mataix-Cols, D., Phillips, M. L., El-Hage, W., Kronhaus, D. M., Cardoner, N., &
- 1006           Surguladze, S. (2012). A new meta-analytic method for neuroimaging studies that combines
- 1007           reported peak coordinates and statistical parametric maps. *European Psychiatry*, 27(8),
- 1008           605–611. <https://doi.org/10.1016/j.eurpsy.2011.04.001>
- 1009   Radua, J., Rubia, K., Canales-Rodríguez, E. J., Pomarol-Clotet, E., Fusar-Poli, P., & Mataix-
- 1010           Cols, D. (2014). Anisotropic kernels for coordinate-based meta-analyses of neuroimaging
- 1011           studies. *Frontiers in Psychiatry*, 5(13), 1–8. <https://doi.org/10.3389/fpsy.2014.00013>
- 1012   Ramsøy, T. Z., Skov, M., Macoveanu, J., Siebner, H. R., & Fosgaard, T. R. (2015). Empathy as a
- 1013           neuropsychological heuristic in social decision-making. *Social Neuroscience*, 10(2), 179–
- 1014           191. <https://doi.org/10.1080/17470919.2014.965341>
- 1015   Rand, D. G., & Nowak, M. A. (2013). Human cooperation. *Trends in Cognitive Sciences*, 17(8),
- 1016           413–425. <https://doi.org/10.1016/j.tics.2013.06.003>
- 1017   Redcay, E., & Moraczewski, D. (2019). Social cognition in context: A naturalistic imaging
- 1018           approach. *NeuroImage*, 216, 116392. <https://doi.org/10.1016/j.neuroimage.2019.116392>
- 1019   Redcay, E., & Schilbach, L. (2019). Using second-person neuroscience to elucidate the
- 1020           mechanisms of social interaction. *Nature Reviews Neuroscience*, 20(8), 496–505.
- 1021           <https://doi.org/10.1038/s41583-019-0179-4>
- 1022   Richman, W. L., Kiesler, S., Weisband, S., & Drasgow, F. (1999). A meta-analytic study of social
- 1023           desirability distortion in computer-administered questionnaires, traditional questionnaires,

- 1024 and interviews. *Journal of Applied Psychology*, 84(5), 754. <https://doi.org/10.1037//0021->
- 1025 9010.84.5.754
- 1026 Rilling, J. K., Gutman, D. A., Zeh, T. R., Pagnoni, G., Berns, G. S., & Kilts, C. D. (2002). A
- 1027 Neural Basis for Social Cooperation. *Neuron*, 35(2), 395–405. <https://ac.els->
- 1028 [cdn.com/S0896627302007559/1-s2.0-S0896627302007559-main.pdf?\\_tid=b30ec185-cd6d-](https://ac.els-cdn.com/S0896627302007559/1-s2.0-S0896627302007559-main.pdf?_tid=b30ec185-cd6d-4ad2-acd6-02d8be7580af&acdnat=1551065251_9b20b10ab6977b1373b83aaf75eaa9ae)
- 1029 [4ad2-acd6-02d8be7580af&acdnat=1551065251\\_9b20b10ab6977b1373b83aaf75eaa9ae](https://ac.els-cdn.com/S0896627302007559/1-s2.0-S0896627302007559-main.pdf?_tid=b30ec185-cd6d-4ad2-acd6-02d8be7580af&acdnat=1551065251_9b20b10ab6977b1373b83aaf75eaa9ae)
- 1030 Rilling, J. K., Sanfey, A. G., Aronson, J. A., Nystrom, L. E., & Cohen, J. D. (2004). The neural
- 1031 correlates of theory of mind within interpersonal interactions. *NeuroImage*, 22(4), 1694–
- 1032 1703. <https://doi.org/10.1016/j.neuroimage.2004.04.015>
- 1033 Ruff, C. C., & Fehr, E. (2014). The neurobiology of rewards and values in social decision
- 1034 making. *Nature Reviews Neuroscience*, 15(8), 549–562. <https://doi.org/10.1038/nrn3776>
- 1035 Rusbult, C. E., & Van Lange, P. A. M. (2003). Interdependence, Interaction, and Relationships.
- 1036 *Annual Review of Psychology*, 54(1), 351–375.
- 1037 <https://doi.org/10.1146/annurev.psych.54.101601.145059>
- 1038 Safin, V., Locey, M. L., & Rachlin, H. (2013). Valuing rewards to others in a prisoner’s dilemma
- 1039 game. *Behavioural Processes*, 99, 145–149. <https://doi.org/10.1016/j.beproc.2013.07.008>
- 1040 Schneider-Hassloff, H., Straube, B., Nuscheler, B., Wemken, G., & Kircher, T. (2015). Adult
- 1041 attachment style modulates neural responses in a mentalizing task. *Neuroscience*, 303, 462–
- 1042 473. <https://doi.org/10.1016/j.neuroscience.2015.06.062>
- 1043 Schreuders, E., Klapwijk, E. T., Will, G. J., & Güroğlu, B. (2018). Friend versus foe: Neural
- 1044 correlates of prosocial decisions for liked and disliked peers. *Cognitive, Affective and*
- 1045 *Behavioral Neuroscience*, 18(1), 127–142. <https://doi.org/10.3758/s13415-017-0557-1>
- 1046 Schreuders, E., Smeekens, S., Cillessen, A. H. N., & Güroğlu, B. (2019). Friends and foes:



- 1047 Neural correlates of prosocial decisions with peers in adolescence. *Neuropsychologia*, *129*,  
1048 153–163. <https://doi.org/10.1016/j.neuropsychologia.2019.03.004>
- 1049 Sharp, C., Burton, P. C., & Ha, C. (2011). “Better the devil you know”: A preliminary study of  
1050 the differential modulating effects of reputation on reward processing for boys with and  
1051 without externalizing behavior problems. *European Child and Adolescent Psychiatry*,  
1052 *20*(11–12), 581–592. <https://doi.org/10.1007/s00787-011-0225-x>
- 1053 Shaw, D. J., Czekóová, K., Staněk, R., Mareček, R., Urbánek, T., Špalek, J., Kopečková, L.,  
1054 Řezáč, J., & Brázdil, M. (2018). A dual-fMRI investigation of the iterated Ultimatum Game  
1055 reveals that reciprocal behaviour is associated with neural alignment. *Scientific Reports*,  
1056 *8*(1), 1–13. <https://doi.org/10.1038/s41598-018-29233-9>
- 1057 Smith-Collins, A. P. R., Fiorentini, C., Kessler, E., Boyd, H., Roberts, F., & Skuse, D. H. (2013).  
1058 Specific neural correlates of successful learning and adaptation during social exchanges.  
1059 *Social Cognitive and Affective Neuroscience*, *8*(8), 887–897.  
1060 <https://doi.org/10.1093/scan/nss079>
- 1061 Smith, D. V., Hayden, B. Y., Truong, T. K., Song, A. W., Platt, M. L., & Huettel, S. A. (2010).  
1062 Distinct value signals in anterior and posterior ventromedial prefrontal cortex. *Journal of*  
1063 *Neuroscience*, *30*(7), 2490–2495. <https://doi.org/10.1523/JNEUROSCI.3319-09.2010>
- 1064 Stanley, D. A., Sokol-Hessner, P., Fareri, D. S., Perino, M. T., Delgado, M. R., Banaji, M. R., &  
1065 Phelps, E. A. (2012). Race and reputation: Perceived racial group trustworthiness influences  
1066 the neural correlates of trust decisions. *Philosophical Transactions of the Royal Society B:*  
1067 *Biological Sciences*, *367*(1589), 744–753. <https://doi.org/10.1098/rstb.2011.0300>
- 1068 Strombach, T., Weber, B., Hangebrauk, Z., Kenning, P., Karipidis, I. I., Tobler, P. N., &  
1069 Kalenscher, T. (2015). Social discounting involves modulation of neural value signals by



- 1070           temporoparietal junction. *Proceedings of the National Academy of Sciences*, *112*(5), 1619–  
1071           1624. <https://doi.org/10.1073/pnas.1414715112>
- 1072   Sul, S., Tobler, P. N., Hein, G., Leiberg, S., Jung, D., Fehr, E., & Kim, H. (2015). Spatial gradient  
1073           in value representation along the medial prefrontal cortex reflects individual differences in  
1074           prosociality. *Proceedings of the National Academy of Sciences*, *112*(25), 7851–7856.  
1075           <https://doi.org/10.1073/pnas.1423895112>
- 1076   Suzuki, S., & O’Doherty, J. P. (2020). Breaking human social decision making into multiple  
1077           components and then putting them together again. *Cortex*, *127*, 221–230.
- 1078   Tabibnia, G., & Lieberman, M. D. (2007). Fairness and cooperation are rewarding: Evidence  
1079           from social cognitive neuroscience. *Annals of the New York Academy of Sciences*, *1118*, 90–  
1080           101. <https://doi.org/10.1196/annals.1412.001>
- 1081   Tabibnia, G., Satpute, A. B., & Lieberman, M. D. (2007). The Sunny Side of Fairness:  
1082           Preference for Fairness Activates Reward Circuitry (and Disregarding Unfairness Activates  
1083           Self-Control Circuitry). *Psychological Science*, *19*(4), 339–347.  
1084           <https://doi.org/10.1111/j.1467-9280.2008.02091.x>
- 1085   Telzer, E. H., Ichien, N., & Qu, Y. (2015). The ties that bind: Group membership shapes the  
1086           neural correlates of in-group favoritism. *NeuroImage*, *115*, 42–51.  
1087           <https://doi.org/10.1016/j.neuroimage.2015.04.035>
- 1088   Telzer, E. H., Masten, C. L., Berkman, E. T., Lieberman, M. D., & Fuligni, A. J. (2011). Neural  
1089           regions associated with self control and mentalizing are recruited during prosocial behaviors  
1090           towards the family. *NeuroImage*, *58*(1), 242–249.  
1091           <https://doi.org/10.1016/j.neuroimage.2011.06.013>
- 1092   *The American Heritage Dictionary of the English Language* (4th ed.). (2000). Houghton Mifflin

- 1093       Harcourt.
- 1094   Thielmann, I., Spadaro, G., & Balliet, D. (2020). Personality and Prosocial Behavior: A  
1095       Theoretical Framework and Meta-Analysis. *Psychological Bulletin*, *146*(1), 30–90.  
1096       <https://doi.org/10.1037/bul0000217.supp>
- 1097   Tognoli, E., Dumas, G., & Kelso, J. A. S. (2017). A roadmap to computational social  
1098       neuroscience. *Cognitive Neurodynamics*, *12*(1), 135–140. [https://doi.org/10.1007/s11571-](https://doi.org/10.1007/s11571-017-9462-0)  
1099       017-9462-0
- 1100   Tricomi, E., & Sullivan-Toole, H. (2015). Fairness and Inequity Aversion. In *Brain Mapping: An*  
1101       *Encyclopedic Reference* (Vol. 3). Elsevier Inc. [https://doi.org/10.1016/B978-0-12-397025-](https://doi.org/10.1016/B978-0-12-397025-1.00142-1)  
1102       1.00142-1
- 1103   Turkeltaub, P. E., Eden, G. F., Jones, K. M., & Zeffiro, T. A. (2002). Meta-analysis of the  
1104       functional neuroanatomy of single-word reading: Method and validation. *NeuroImage*,  
1105       *16*(3), 765–780. <https://doi.org/10.1006/nimg.2002.1131>
- 1106   Turner, J. A., & Laird, A. R. (2012). The cognitive paradigm ontology: Design and application.  
1107       *Neuroinformatics*, *10*(1), 57–66. <https://doi.org/10.1007/s12021-011-9126-x>
- 1108   Tusche, A., Bockler, A., Kanske, P., Trautwein, F.-M., & Singer, T. (2016). Decoding the  
1109       Charitable Brain: Empathy, Perspective Taking, and Attention Shifts Differentially Predict  
1110       Altruistic Giving. *Journal of Neuroscience*, *36*(17), 4719–4732.  
1111       <https://doi.org/10.1523/JNEUROSCI.3392-15.2016>
- 1112   Tusche, A., & Hutcherson, C. A. (2018). Cognitive regulation alters social and dietary choice by  
1113       changing attribute representations in domain-general and domain-specific brain circuits.  
1114       *ELife*, *7*, e31185. <https://doi.org/10.7554/eLife.31185>
- 1115   van den Bos, W., van Dijk, E., Westenberg, M., Rombouts, S. A. R. B., & Crone, E. A. (2009).

- 1116 What motivates repayment? Neural correlates of reciprocity in the Trust Game. *Social*  
1117 *Cognitive and Affective Neuroscience*, 4(3), 294–304. <https://doi.org/10.1093/scan/nsp009>
- 1118 Vekaria, K. M., O’Connell, K., Rhoads, S. A., Brethel-Haurwitz, K. M., Cardinale, E. M.,  
1119 Robertson, E. L., Walitt, B., VanMeter, J. W., & Marsh, A. A. (2020). Activation in bed  
1120 nucleus of the stria terminalis (BNST) corresponds to everyday helping. *Cortex*, 127, 67–  
1121 77. <https://doi.org/10.1016/j.cortex.2020.02.001>
- 1122 Watanabe, T., Takezawa, M., Nakawake, Y., Kunimatsu, A., Yamasue, H., Nakamura, M.,  
1123 Miyashita, Y., & Masuda, N. (2014). Two distinct neural mechanisms underlying indirect  
1124 reciprocity. *Proceedings of the National Academy of Sciences*, 111(11), 3990–3995.  
1125 <https://doi.org/10.1073/pnas.1318570111>
- 1126 Weiland, S., Hewig, J., Hecht, H., Mussel, P., & Miltner, W. H. R. (2012). Neural correlates of  
1127 fair behavior in interpersonal bargaining. *Social Neuroscience*, 7(5), 537–551.  
1128 <https://doi.org/10.1080/17470919.2012.674056>
- 1129 Wheatley, T., Boncz, A., Toni, I., & Stolk, A. (2019). Beyond the Isolated Brain: The Promise  
1130 and Challenge of Interacting Minds. *Neuron*, 103(2), 186–188.  
1131 <https://doi.org/10.1016/j.neuron.2019.05.009>
- 1132 Will, G. J., Crone, E. A., Van Lier, P. A. C., & Güroğlu, B. (2016). Neural correlates of  
1133 retaliatory and prosocial reactions to social exclusion: Associations with chronic peer  
1134 rejection. *Developmental Cognitive Neuroscience*, 19, 288–297.  
1135 <https://doi.org/10.1016/j.dcn.2016.05.004>
- 1136 Wills, J. A., Hackel, L., FeldmanHall, O., Parnamets, P., & Van Bavel, J. J. (2018). The Social  
1137 Neuroscience of Cooperation. *PsyArXiv*, 1–31. <https://doi.org/10.31234/osf.io/8kcd4>
- 1138 Wills, J. A., Hackel, L., & Van Bavel, J. (2018). Shifting prosocial intuitions: Neurocognitive

- 1139 evidence for a value based account of group-based cooperation. *PsyArXiv*.
- 1140 Wittmann, M. K., Kolling, N., Faber, N. S., Scholl, J., Nelissen, N., & Rushworth, M. F. S.  
1141 (2016). Self-Other Mergence in the Frontal Cortex during Cooperation and Competition.  
1142 *Neuron*, 91(2), 482–493. <https://doi.org/10.1016/j.neuron.2016.06.022>
- 1143 Wu, H., Luo, Y., & Feng, C. (2016). Neural signatures of social conformity: A coordinate-based  
1144 activation likelihood estimation meta-analysis of functional brain imaging studies.  
1145 *Neuroscience and Biobehavioral Reviews*, 71, 101–111.  
1146 <https://doi.org/10.1016/j.neubiorev.2016.08.038>
- 1147 Yang, Z., Zheng, Y., Yang, G., Li, Q., & Liu, X. (2019). Neural signatures of cooperation  
1148 enforcement and violation: a coordinate-based meta-analysis. *Social Cognitive and Affective*  
1149 *Neuroscience*, 14(9), 919–931. <https://doi.org/10.1093/scan/nsz073>
- 1150 Zaki, J., & Mitchell, J. P. (2011). Equitable decision making is associated with neural markers of  
1151 intrinsic value. *Proceedings of the National Academy of Sciences*, 108(49), 19761–19766.  
1152 <https://doi.org/10.1073/pnas.1112324108>
- 1153 Zaki, J., & Mitchell, J. P. (2013). Intuitive Prosociality. *Current Directions in Psychological*  
1154 *Science*, 22(6), 466–470. <https://doi.org/10.1177/0963721413492764>
- 1155 Zinchenko, O., & Arsalidou, M. (2018). Brain responses to social norms: Meta-analyses of fMRI  
1156 studies. *Human Brain Mapping*, 39(2), 955–970. <https://doi.org/10.1002/hbm.23895>
- 1157
